# Supplementary material
Source: PubMed Central journal article supplement (PMC4251511)
Supplement: supp_2.4.E268_2014-0019.R3-1-at.pdf [file supp_2.4.E268_2014-0019.R3-1-at.pdf]

## Appendix 1 (as supplied by the authors): Search strategy example

### Database:

Medline OVID

### Date Last Run:

June 27, 2013

### Search Terms:

1. (suicide adj prevent\*).tw.
2. Weight Reduction Programs/
3. exp obesity/pc
4. Overweight/pc
5. weight maintenance.tw.
6. weight management.tw.
7. Diet, Reducing/
8. Diet, Fat-Restricted/
9. Caloric Restriction/
10. Diet Therapy/
11. (diet\* adj counsel\*).ti,ab.
12. (diet\* adj education\*).ti,ab.
13. (nutrition\* adj (counsel\* or education\* or intervention)).ti,ab.
14. (diet\$ adj (modi\*\$ or therapy or intervention\* or strateg\* or healthy)).ti,ab.
15. ((diet or dieting or slim\$) adj (club\$ or organi?ation\$)).ti,ab.
16. ((healthy living or healthy lifestyle) adj (program\* or intervention? or group or club or strategy)).tw.
17. (weightwatcher\* or weight watcher\* or commerical weightloss or commerical weight loss or Jenny Craig).tw.
18. exp \*Exercise/
19. Exercise Therapy/
20. Motor Activity/
21. Physical Fitness/
22. physical activity.ti,ab.
23. (exercise adj3 (program\* or intervention\* or strategy or club?)).ti,ab.
24. Fitness Centers/
25. health promotion/ or preventive health services/
26. Primary Prevention/
27. 25 or 26
28. exp \*obesity/
29. \*overweight/
30. \*Weight Gain/
31. 28 or 29 or 30
32. 27 and 31
33. 2 or 3 or 4 or 5 or 6
34. 7 or 8 or 9 or 10 or 11 or 12 or 13 or 14 or 15 or 16 or 17 or 18 or 19 or 20 or 21 or 22 or 23 or 24
35. 27 and 34
36. exp obesity/

37. overweight/
38. weight gain/
39. Weight Loss/
40. (weight or bmi or body mass index or waist circumference or obese or obesity).ti.
41. 36 or 37 or 38 or 39 or 40
42. 35 and 41
43. 32 or 33 or 42
44. animals/ not humans/
45. 43 not 44
46. limit 45 to "all child (0 to 18 years)"
47. limit 45 to "all adult (19 plus years)"
48. 46 not 47
49. 45 not 48
50. limit 49 to (english or french)
51. limit 50 to (case reports or comment or editorial or in vitro or letter or news or newspaper article or webcasts)
52. 50 not 51
53. limit 52 to ed=20120426-20130527
54. meta-analysis/
55. exp meta-analysis as topic/
56. (meta analy\* or metaanaly\* or met analy\* or metanaly\*).tw.
57. review literature as topic/
58. (collaborative research or collaborative review\* or collaborative overview\*).tw.
59. (integrative research or integrative review\* or intergrative overview\*).tw.
60. (quantitative adj3 (research or review\* or overview\*)).tw.
61. (research integration or research overview\*).tw.
62. (systematic\* adj3 (review\* or overview\*)).tw.
63. (methodologic\* adj3 (review\* or overview\*)).tw.
64. exp technology assessment biomedical/
65. (hta or thas or technology assessment\*).tw.
66. ((hand adj2 search\*) or (manual\* adj search\*)).tw.
67. ((electronic adj database\*) or (bibliographic\* adj database\*)).tw.
68. ((data adj2 abstract\*) or (data adj2 extract\*)).tw.
69. (analys\* adj3 (pool or pooled or pooling)).tw.
70. mantel haenszel.tw.
71. (cohrane or pubmed or pub med or medline or embase or psycinfo or psyclit or psychinfo or psychlit or cinahl or science citation index).ab.
72. or/54-71
73. limit 53 to "review"
74. 53 and 72
75. 73 not 74
76. 53 not 75
77. (weight or BMI or waist circumference or waist to hip ratio).mp.
78. Lifestyle.ti.
79. \*Life Style/
80. 78 or 79

81. 77 and 80
82. 27 and 81
83. (prevent or prevention or primary care).tw.
84. 81 and 83
85. 82 or 84
86. limit 85 to (english or french)
87. limit 86 to (case reports or comment or editorial or in vitro or letter or news or newspaper article or webcasts)
88. 86 not 87
89. animals/ not humans/
90. 88 not 89
91. limit 90 to "all child (0 to 18 years)"
92. limit 90 to "all adult (19 plus years)"
93. 91 not 92
94. 90 not 93
95. limit 94 to "review"
96. 72 and 94
97. 95 not 96
98. 94 not 97
99. 98 not 76
100. limit 99 to yr="1980 -Current"
101. 76 or 100
