# Supplementary material
Source: PubMed Central journal article supplement (PMC4251511)
Supplement: supp_2.4.E268_2014-0019_original_submission.pdf [file supp_2.4.E268_2014-0019_original_submission.pdf]

## Prevention of Overweight/Obesity in Adult Populations: A Systematic Review with Meta-analyses

|                               |                                                                                                                                                                                                                                                                                                                                                                                                                                                                                                                                                                                                                                                                                                                                                                                                                                                                                                                                                                                                                                                                                                                                                                                                                                                                                                                                                                                                                            |
|-------------------------------|----------------------------------------------------------------------------------------------------------------------------------------------------------------------------------------------------------------------------------------------------------------------------------------------------------------------------------------------------------------------------------------------------------------------------------------------------------------------------------------------------------------------------------------------------------------------------------------------------------------------------------------------------------------------------------------------------------------------------------------------------------------------------------------------------------------------------------------------------------------------------------------------------------------------------------------------------------------------------------------------------------------------------------------------------------------------------------------------------------------------------------------------------------------------------------------------------------------------------------------------------------------------------------------------------------------------------------------------------------------------------------------------------------------------------|
| Journal:                      | <i>CMAJ Open</i>                                                                                                                                                                                                                                                                                                                                                                                                                                                                                                                                                                                                                                                                                                                                                                                                                                                                                                                                                                                                                                                                                                                                                                                                                                                                                                                                                                                                           |
| Manuscript ID:                | CMAJOpen-2014-0019                                                                                                                                                                                                                                                                                                                                                                                                                                                                                                                                                                                                                                                                                                                                                                                                                                                                                                                                                                                                                                                                                                                                                                                                                                                                                                                                                                                                         |
| Manuscript Type:              | Meta-analysis/Systematic review                                                                                                                                                                                                                                                                                                                                                                                                                                                                                                                                                                                                                                                                                                                                                                                                                                                                                                                                                                                                                                                                                                                                                                                                                                                                                                                                                                                            |
| Date Submitted by the Author: | 24-Feb-2014                                                                                                                                                                                                                                                                                                                                                                                                                                                                                                                                                                                                                                                                                                                                                                                                                                                                                                                                                                                                                                                                                                                                                                                                                                                                                                                                                                                                                |
| Complete List of Authors:     | Peirson, Leslea; McMaster Evidence Review and Synthesis Centre, Douketis, James D.; St. Joseph's Hospital, Ciliska, Donna; McMaster University, School of Nursing Fitzpatrick-Lewis, Donna; McMaster University, Ali, Muhammad; McMaster University, Epidemiology and Biostatistics Raina, Parminder; McMaster University, Clinical Epidemiology and Biostatistics;                                                                                                                                                                                                                                                                                                                                                                                                                                                                                                                                                                                                                                                                                                                                                                                                                                                                                                                                                                                                                                                        |
| Keywords:                     | Obesity, Systematic review                                                                                                                                                                                                                                                                                                                                                                                                                                                                                                                                                                                                                                                                                                                                                                                                                                                                                                                                                                                                                                                                                                                                                                                                                                                                                                                                                                                                 |
| More Detailed Keywords:       |                                                                                                                                                                                                                                                                                                                                                                                                                                                                                                                                                                                                                                                                                                                                                                                                                                                                                                                                                                                                                                                                                                                                                                                                                                                                                                                                                                                                                            |
| Abstract:                     | <p><b>Abstract</b></p> <p><b>Background:</b> The purpose of this report is to synthesize evidence on behavioral interventions for preventing weight gain in normal weight adults.</p> <p><b>Methods:</b> We searched multiple databases from January 1980 to June 27, 2013, for trials in English or French. Study quality was assessed using the Cochrane Risk of Bias tool and GRADE.</p> <p><b>Results:</b> A total of 26 studies were included. Programs were successful in stabilizing weight and producing weight loss by the end of the interventions. Intervention participants lost 0.73 more kg (95% CI -0.93, -0.54, <math>P &lt; 0.00001</math>), lowered their BMI by 0.24 kg/m<sup>2</sup> more (95% CI -0.34, -0.15, <math>P &lt; 0.00001</math>), reduced their waist circumference by an additional 0.95 cm (95% CI -1.27, -0.63, <math>P &lt; 0.00001</math>) and lost 1.27% more total body fat (95% CI -1.93, -0.61, <math>P = 0.0002</math>) compared to the control group. Small but not clinically meaningful effect sizes were found for secondary outcomes.</p> <p><b>Interpretation:</b> Behavioral interventions are associated with reductions in weight and other disease indicators in mixed weight adult populations but it is uncertain if these changes are clinically meaningful and if they are maintained over time.</p> <p><b>Funding:</b> Canadian Institutes of Health Research</p> |

1  
2  
3  
4  
5  
6  
7  
8  
9  
10  
11  
12  
13  
14  
15  
16  
17  
18  
19  
20  
21  
22  
23  
24  
25  
26  
27  
28  
29  
30  
31  
32  
33  
34  
35  
36  
37  
38  
39  
40  
41  
42  
43  
44  
45  
46  
47  
48  
49  
50  
51  
52  
53  
54  
55  
56  
57  
58  
59  
60

SCHOLARONE™  
Manuscripts

Confidential

1  
2  
3  
4  
5  
6  
7  
8  
9  
10  
11  
12  
13

## Prevention of Overweight/Obesity in Adult Populations: A Systematic Review with Meta-analyses

14 Leslea Peirson PhD<sup>1</sup>, James Douketis MD<sup>2,3</sup>, Donna Ciliska PhD<sup>1</sup>, Donna Fitzpatrick-Lewis  
15 MSc<sup>1</sup>, Ali Usman MD, MSc<sup>1</sup>, P Raina PhD<sup>1</sup>  
16  
17

- 18  
19  
20  
21  
22  
23  
24  
25  
26
1. McMaster Evidence Review and Synthesis Centre, DTC 3<sup>rd</sup> floor, McMaster University  
1280 Main Street West, Hamilton, Ontario Canada L8S 4K1
  2. Department of Medicine, McMaster University
  3. St. Joseph's HealthCare, Room F 403, 50 Charlton Ave. E. Hamilton Ontario L8N 4A6

27  
28  
29  
30  
31  
32  
33  
34

**Correspondence to:** Donna Ciliska  
DTC 3<sup>rd</sup> floor, McMaster University  
1280 Main Street West, Hamilton, Ontario Canada L8S 4K1  
phone: 1 905-525-9140, ext 22529  
[ciliska@mcmaster.ca](mailto:ciliska@mcmaster.ca)

35  
36

### Competing interests:

37  
38  
39  
40  
41  
42  
43  
44  
45

All authors have completed the ICMJE uniform disclosure form at [www.icmje.org/coi\\_disclosure.pdf](http://www.icmje.org/coi_disclosure.pdf) and declare: no support from any organisation for the submitted work; no financial relationships with any organisations that might have an interest in the submitted work in the previous three years; no other relationships or activities that could appear to have influenced the submitted work.”

46  
47

### Counts:

48  
49  
50  
51  
52  
53  
54  
55  
56  
57  
58  
59  
60

Manuscript: 3,730 words  
Figures: 1  
Tables: 4

## Abstract

**Background:** The purpose of this report is to synthesize evidence on behavioral interventions for preventing weight gain in normal weight adults.

**Methods:** We searched multiple databases from January 1980 to June 27, 2013, for trials in English or French. Study quality was assessed using the Cochrane Risk of Bias tool and GRADE.

**Results:** A total of 26 studies were included. Programs were successful in stabilizing weight and producing weight loss by the end of the interventions. Intervention participants lost 0.73 more kg (95% CI -0.93, -0.54,  $P < 0.00001$ ), lowered their BMI by 0.24 kg/m<sup>2</sup> more (95% CI -0.34, -0.15,  $P < 0.00001$ ), reduced their waist circumference by an additional 0.95 cm (95% CI -1.27, -0.63,  $P < 0.00001$ ) and lost 1.27% more total body fat (95% CI -1.93, -0.61,  $P = 0.0002$ ) compared to the control group. Small but not clinically meaningful effect sizes were found for secondary outcomes.

**Interpretation:** Behavioral interventions are associated with reductions in weight and other disease indicators in mixed weight adult populations but it is uncertain if these changes are clinically meaningful and if they are maintained over time.

**Funding:** Canadian Institutes of Health Research

## INTRODUCTION

Overweight and obesity, defined by a body mass index (BMI) of 25-29.9 kg/m<sup>2</sup>, and  $\geq 30$  kg/m<sup>2</sup>, are global problems with increasing prevalence in most countries.<sup>1</sup> Excess adiposity is related to considerable increase in morbidity<sup>2-4</sup> and premature mortality.<sup>5,6</sup>

The natural history of weight changes in adults has not been well studied but data were collected on Canadian adults through the National Population Health Survey and analyzed for changes in the time periods of 1996/1997 to 2004/2005. The overall change during eight years was average gain of 4 kg for men and 3.4 kg for women.<sup>7</sup> A large cohort study conducted in the United States found that non-obese adults gain, on average, 0.8 pounds (about 0.36 kg) per year.<sup>8</sup>

Several groups have produced guidelines related to overweight and obesity. The Australian<sup>9</sup>, New Zealand<sup>10</sup>, Scottish Intercollegiate Guidelines Network (SIGN)<sup>11</sup>, and United States Preventive Services Task Force (USPSTF)<sup>12</sup> guidelines focused on treatment of overweight and/or obesity. The Obesity Canada Clinical Guidelines Expert Panel made recommendations for interventions for prevention of weight gain, but the underlying studies were graded as B or C (unclear whether benefits outweigh risks).<sup>13</sup> Similarly, the NICE recommendations about healthy lifestyle for weight gain prevention were based on cohort studies.<sup>14</sup>

Many guideline groups have identified a gap in knowledge of interventions that help people maintain normal weight. While prevention is ideal, is there high quality evidence that interventions in people of normal weight (BMI 18.5 kg/m<sup>2</sup> to 24.9 kg/m<sup>2</sup>) prevent weight gain?

We aimed to identify interventions applicable to primary care settings aimed at preventing weight gain, particularly in normal weight adults. The key question for this review was: Do preventive interventions (behavioral) in normal weight adults lead to short-term or sustained

1  
2  
3 weight gain prevention, or improved health outcomes? Primary outcomes were weight, BMI,  
4 waist circumference, and % body fat; secondary outcomes included total and LDL cholesterol,  
5 blood pressure, fasting glucose, and incidence of type 2 diabetes (T2D). Secondary questions  
6 explored were: a) differences in efficacy between patient subgroups (e.g., age  $\geq 65$  years, sex,  
7 baseline cardiovascular risk status); b) adverse effects (e.g., labelling; disordered eating;  
8 psychological distress such as anxiety, depression and stigma; nutritional deficits; cost burden);  
9 c) differences in adverse effects between adult subgroups (e.g., age  $\geq 65$  years, sex, baseline  
10 cardiovascular risk status) and d) maintenance weight or health outcome changes.  
11  
12

13  
14  
15  
16  
17  
18  
19  
20  
21  
22 A concurrent review to this one, studied a similar question but with different inclusion/exclusion  
23 criteria. Hutfless and colleagues included 11 trials and 11 observational studies and concluded  
24 that there may be effective strategies to prevent weight gain (low fat diets, eating fewer meals  
25 out of the home, consuming more fruits and vegetables, monitoring heart rate during exercise  
26 and participation in group lifestyle sessions with reminder text messages).<sup>15</sup>  
27  
28  
29  
30  
31  
32  
33  
34

## 35 **METHODS**

36  
37  
38 The protocol was registered with PROSPERO (# CRD42012002753)  
39  
40  
41 ([www.crd.york.ac.uk/prospero/](http://www.crd.york.ac.uk/prospero/)).  
42  
43

## 44 **Search**

45  
46 We searched EMBASE, Medline, Cochrane Central Registry of Controlled Trials, and  
47 PsychINFO from January 1980 to June 27, 2013. Reference lists of primary studies included in  
48 this review and related systematic reviews were searched for relevant studies not captured by our  
49 search. The search strategy example for Medline-Ovid is provided in the online supplemental file  
50  
51  
52  
53  
54  
55  
56  
57  
58  
59  
60 (Table 3). In addition, a focused grey literature search of Canadian sources was done for recent

1  
2  
3 reports on obesity in Canada. All citations were uploaded to a web-based systematic review  
4  
5 software program<sup>16</sup> for screening and data extraction.  
6  
7

### 8 9 **Study Selection, Quality Assessment and Abstraction**

10  
11 Titles and abstracts of papers were reviewed in duplicate; articles marked for inclusion by either  
12  
13 team member went on to full text screening, which was also done independently by two people.  
14  
15

16 One team member completed full data abstraction and a second member verified all extracted  
17  
18 data. All data were checked in a third round of verification prior to analysis. RCTs were assessed  
19  
20 using Cochrane's Risk of Bias tool<sup>17</sup> and overall strength of the evidence was determined using  
21  
22 GRADE.<sup>18,19</sup> The online supplemental file Table 1, summarizes the risk of bias ratings. At all  
23  
24 levels, inter-rater conflicts were resolved through discussion.  
25  
26  
27

### 28 29 **Inclusion and Exclusion Criteria**

30  
31 Studies had to be randomized trials conducted in adults with a normal BMI (18-24.9 kg/m<sup>2</sup>),  
32  
33 reported in English or French. If there was no explicit statement about normal weight status we  
34  
35 accepted studies when the baseline mean BMI minus one standard deviation (SD) fell below 25.  
36  
37  
38

39 Trials limited to participants with cardiovascular disease or conditions which are predisposed to  
40  
41 weight gain such as the metabolic syndrome, polycystic ovarian disease and pregnancy were  
42  
43 excluded; as were studies focused on underweight adults or those with eating disorders.  
44  
45

46 Behavioural interventions had to centre on weight gain prevention and could include diet,  
47  
48 exercise, diet plus exercise, or lifestyle strategies. Lifestyle strategies were typically referred to  
49  
50 as such and usually included additional counseling, education or support and environmental  
51  
52 changes in addition to diet and/or exercise. Pharmacological and surgical interventions were  
53  
54 excluded.  
55  
56  
57  
58  
59  
60

1  
2  
3 Trials were conducted in settings generalizable to Canadian primary care, feasible for conducting  
4 in primary care or feasible for referral from primary care. Studies conducted in hospital or  
5 institutional settings, school-based programs, occupational settings, faith-based programs, and  
6 other settings deemed not generalizable to primary care, such as those with existing social  
7 networks among participants or the ability to offer intervention elements that could not be  
8 replicated in a primary care setting were excluded.  
9

10  
11  
12  
13  
14  
15  
16  
17  
18 Only studies that reported outcome data for at least 12 months post baseline assessment for one  
19 or more of the specified weight outcomes (weight, BMI, waist circumference, % body fat) were  
20 included. There were no timeframe or weight outcome requirements if a study reported data for  
21 any of the adverse effects of interest to this review. Secondary outcomes included total  
22 cholesterol (TC), low density lipoprotein (LDL), fasting glucose (FG), incidence of T2D, systolic  
23 blood pressure (SBP), and diastolic blood pressure (DBP).  
24  
25  
26  
27  
28  
29  
30  
31

### 32 **Data Analysis**

33  
34  
35 For meta-analyses, immediate post-treatment data (means, standard deviations) were utilized for  
36 continuous outcomes while number of events data were utilized for binary outcomes (i.e.,  
37 incidence of T2D). The DerSimonian and Laird random effects models with inverse variance  
38 method were utilized to generate the summary measures of effect in the form of mean difference  
39 (MD) for continuous outcomes and risk ratio (RR) for binary outcomes.<sup>20</sup>  
40  
41  
42  
43  
44  
45  
46  
47

48 MDs were calculated using change from baseline data [i.e., mean difference between pre-  
49 treatment (baseline) and post-treatment (final/end-point) values along with its standard deviation  
50 (SD) for both intervention and control groups]. For studies that did not report SD, we calculated  
51 this value from the reported standard error (SE) of the mean, or from the 95% confidence  
52 intervals (CI) using equations provided in Chapter 9 of the *Cochrane Handbook for Systematic*  
53  
54  
55  
56  
57  
58  
59  
60



1  
2  
3 *Reviews of Interventions.*<sup>21</sup> For studies that provided neither SD nor SE for the follow-up data,  
4 we imputed the SD from either the baseline values or other included studies of similar sample  
5 size and for the same outcome. The units of measurement for total cholesterol, LDL and fasting  
6 glucose, if reported in mg/dL, were converted to Canadian standard units (i.e., mmol/L).  
7

8  
9  
10  
11  
12 For studies that recruited a single gender or for mixed gender studies that reported results for men  
13 and for women, we entered this data separately into the meta-analyses, using alphabetical  
14 extensions to identify gender (e.g., Imayama 2011-M, Imayama 2011-F). For studies with more  
15 than one intervention arm (e.g., two diet + exercise arms, one using a clinic-based group and one  
16 using a correspondence course), we pooled data from the intervention groups to do a pair-  
17 wise comparison with the control group. Alternatively, if the interventions were substantively  
18 different from each other (e.g., a low calorie diet group and a high intensity aerobic exercise group),  
19 we included the data for each intervention arm compared with the control group but split the  
20 sample size for the control group in half to avoid a unit-of-analysis error and double counting.<sup>17</sup>  
21  
22  
23  
24  
25  
26  
27  
28  
29  
30  
31  
32  
33  
34

35 We used Cochran's Q ( $\alpha=0.10$ ) and the  $I^2$  statistic to quantify heterogeneity, where  $P<0.05$   
36 indicated a high level of statistical heterogeneity between studies. Although there are no strict  
37 rules for interpreting  $I^2$  a rough guide is that an  $I^2 >50\%$  may represent substantial  
38 heterogeneity.<sup>21</sup> Sensitivity analyses were performed to evaluate statistical stability and effect on  
39 statistical heterogeneity. For the outcome of weight in kg, we did sensitivity analyses based on  
40 type of intervention (diet, exercise, diet + exercise, lifestyle), length of intervention ( $\leq 12$  months,  
41  $>12$  months), gender, participants' baseline CVD risk status (high risk: identified as having CVD  
42 risk factors and/or diagnosed with T2D, hypertension, dyslipidemia; low/no CVD risk or  
43 unselected population or not specified), and study risk of bias rating (high, unclear, low). One  
44 additional sensitivity analysis was performed based on baseline mean BMI ( $<25$ ,  $\geq 25$ ) for the  
45  
46  
47  
48  
49  
50  
51  
52  
53  
54  
55  
56  
57  
58  
59  
60

1  
2  
3 outcome of BMI. Meta-analyses were performed using Review Manager version 5.1 software.<sup>17</sup>  
4  
5 Publication bias for each outcome was assessed using the Egger's test.<sup>22</sup>  
6  
7

8  
9 Role of funding source: The Canadian Institutes of Health Research had no role in the design,  
10  
11 analyses, interpretation or decision to submit the report for publication.  
12

## 13 14 **RESULTS**

### 15 16 17 **Search Summary**

18  
19  
20 We conducted four reviews, for obesity prevention in children, obesity treatment in children,  
21  
22 obesity prevention in adults, and obesity treatment in adults. We believed some efficiency would  
23  
24 be gained in the screening stage if we started with a comprehensive search strategy. Thus, the  
25  
26 search and selection process for relevant literature occurred in stages. First, a comprehensive  
27  
28 search including both adults and children located 30,196 unique citations of which 3,320 were  
29  
30 for consideration for adult prevention (see supplemental file Figure 1a). The literature search was  
31  
32 updated in June 2013 and added 1,778 citations for possible inclusion. We conducted hand-  
33  
34 searches and reviewed reference lists of recent (published in 2012 and 2013) on topic systematic  
35  
36 reviews to ensure that we had not missed relevant studies. Five studies were located in those  
37  
38 reference lists that were not found through the database search.  
39  
40  
41  
42  
43

44  
45 At the end of the search and selection process, 26 studies with 48 papers met the inclusion  
46  
47 criteria for the adult prevention review (see supplemental file Figure 1b). All studies reported  
48  
49 weight outcome data. Most (81%) of the studies were rated as having unclear or high risk of bias  
50  
51 for the weight outcomes, primarily due to lack of information about or lack of procedures to  
52  
53 ensure random sequence generation, allocation concealment and/or blinding of outcome  
54  
55 assessment (see supplement file, Table 1). Due to the nature of behavioral interventions, there  
56  
57  
58  
59  
60

1  
2  
3 was also high risk of bias for blinding of participants and personnel across all studies. The adults  
4  
5 who volunteered or agreed to participate in these studies may have been more weight conscious  
6  
7 than the general population and some may have been better motivated to lose weight.  
8  
9

10  
11 Although this review focuses on the prevention of overweight and obesity, the population was  
12  
13 not restricted to normal weight adults. A single study<sup>23</sup> was found that included only normal  
14  
15 weight adults (BMI >18 and <24.9). The criteria were, therefore, expanded to allow studies that  
16  
17 included at least some normal weight adults, with the conditions that at least one study arm had a  
18  
19 baseline mean BMI <25 or baseline mean BMI >25 but minus one SD <25, or the number or  
20  
21 percentage of normal weight participants was specified. Four studies were found that reported a  
22  
23 baseline mean BMI for at least one study group that fell within the normal range;<sup>24-27</sup> 16 studies  
24  
25 reported baseline mean BMIs that fell in the overweight range (25 to 29.9) and in five studies at  
26  
27 least one intervention arm had a baseline mean BMI just over the obesity threshold of 30  
28  
29  
30  
31 kg/m<sup>2</sup>.<sup>28-32</sup>  
32  
33  
34  
35

36 None of the included studies specifically targeted or recruited seniors ( $\geq 65$  years). Most studies  
37  
38 (n=18) included mixed gender samples; seven targeted only women<sup>31,33-38</sup> and the analysis in one  
39  
40 study was limited to male participants.<sup>39</sup> Few studies (n=4) were directed at participants at high  
41  
42 risk for cardiovascular disease (i.e., screened/identified as high CVD risk and/or diagnosed with  
43  
44 T2D, hypertension and/or dyslipidemia).<sup>30,40-42</sup> The intervention duration was  $\leq 1$  year in over  
45  
46 two-thirds of the studies (n=18); in the remaining 8 studies the duration ranged from two years to  
47  
48 up to 12 years, with half of these interventions (n=4) running for two years. Just over one-third  
49  
50 of the studies (n=10) were done in European countries, with the remainder in the US (n=7),  
51  
52  
53  
54  
55  
56  
57  
58  
59  
60  
61 Australia and/or New Zealand (n=4) and Japan (n=2). Less than half of the studies (n=11) were

1  
2  
3 published in the last five years (2009-2012). The characteristics of the 26 included studies are  
4  
5 reported in the online supplement file, Table 2.  
6  
7

## 8 9 **Weight**

10  
11  
12 We were unable to conclusively determine whether primary care-relevant interventions prevent  
13  
14 weight gain or lead to improved health outcomes in normal weight adults. As noted above, the  
15  
16 search found one study that included only normal weight adults that met the inclusion criteria.<sup>23</sup>  
17

18  
19 The “Pound of Prevention” pilot study examined the effects of a 12 month, education and  
20  
21 incentive-based lifestyle intervention in the US over 25 years ago with approximately 200  
22  
23 normal weight adults (defined as <115% of ideal weight as indicated by the Metropolitan Life  
24  
25 Insurance Company tables for 1983). More intervention participants (82%) maintained their  
26  
27 baseline weight or lost weight over the 12 month intervention compared with control group  
28  
29 participants (56%). On average, intervention group participants lost 0.95 kg whereas control  
30  
31 group participants lost 0.14 kg (P=0.03). Aside from weight, this study did not report any  
32  
33 outcomes of interest to this review.  
34  
35  
36  
37

38  
39 Given scant direct evidence to answer the key question of this prevention focused review, the  
40  
41 criteria were expanded to allow studies that included some normal weight adults, as explained  
42  
43 above. Twenty-five studies were found that met the expanded inclusion criteria. Therefore, the  
44  
45 following analyses, based on subgroups of the 26 included RCTs, provide indirect evidence to  
46  
47 address the review questions.  
48  
49

50  
51 Nineteen RCTs of very low GRADE quality with a total of 48,460 participants provided data on  
52  
53 weight that could be pooled. Across the 19 studies, baseline BMI ranged from 22.4 to 30.1; in  
54  
55 three of the studies the baseline mean BMI of at least one study arm was <25; in 16 studies the  
56  
57  
58  
59  
60

1  
2  
3 baseline mean BMIs were in the overweight/obese range. There was a statistically significant  
4 reduction in weight in the intervention group as compared with the control group [MD (95% CI)  
5 -0.73 kg (-0.93, -0.54)] (see Figure 1). Subanalysis by type of intervention found a reduction in  
6 weight in the intervention group as compared with the control group for diet [MD (95% CI) -0.51  
7 kg (-0.65, -0.36)]; exercise [MD (95% CI) -0.88 kg (-1.44, -0.33)]; diet and exercise [MD (95%  
8 CI) -0.99 kg (-1.90, -0.08)]; and lifestyle interventions [MD (95% CI) -0.89 kg (-1.44, -0.34)]  
9 (see Table 1).  
10  
11  
12  
13  
14  
15  
16  
17  
18  
19

20 The test for subgroup differences found no significant results for duration of the intervention (> or  
21 <12 months) [ $\text{Chi}^2=3.07$ ,  $\text{df}=1$  ( $P=0.08$ ),  $I^2=67\%$ ] or gender [ $\text{Chi}^2=1.34$ ,  $\text{df}=1$  ( $P=0.25$ ),  $I^2=25\%$ ].  
22 Weight loss interventions were effective for both those considered at high CVD risk [MD (95%  
23 CI) -0.88 kg (-1.45, -0.32)] and no or low CVD risk [MD (95% CI) -0.72 kg (-0.93, -0.52)]; and  
24 for those studies at unclear [MD (95% CI) -0.53 kg (-0.67, -0.40)] and low risk of bias [MD (95%  
25 CI) -1.22 kg (-2.16, -0.28)], but not for studies rated as high risk of bias [MD (95% CI) -1.20 kg (-  
26 3.04, 0.64)] (see Table 1).  
27  
28  
29  
30  
31  
32  
33  
34  
35  
36

## 37 BMI

38 Twenty RCTs of low GRADE quality with a total of 52,243 participants, whose baseline BMIs  
39 ranged from 22.4 to 33.2, were included. Most studies ( $n=14$ ) included mixed gender samples.  
40  
41

42 There was a statistically significant reduction in BMI in the intervention group as compared with  
43 the control group [MD (95% CI) -0.24  $\text{kg}/\text{m}^2$  (-0.34, -0.15)]. The test for subgroup differences  
44 was not significant [ $\text{Chi}^2=0.06$ ,  $\text{df}=1$  ( $P=0.81$ ),  $I^2=0\%$ ] and, therefore, baseline mean BMI did not  
45 explain the variation across these studies (see Table 2).  
46  
47  
48  
49  
50  
51  
52

53 When restricted to studies with a mean baseline BMI <25, the analysis included four RCTs of low  
54 GRADE quality. Baseline BMI ranged from 22.4 to 24.8 but all studies included some  
55  
56  
57  
58  
59  
60

1  
2  
3 overweight/obese adults. BMI was reduced more in the intervention group than the control [MD  
4 (95% CI) -0.27 kg/m<sup>2</sup> (-0.50, -0.05)]. This benefit was also observed in intervention groups in 16  
5  
6 RCTs with a baseline BMI  $\geq$ 25 [MD (95% CI) -0.24 kg/m<sup>2</sup> (-0.36, -0.12)] (see Table 2).  
7  
8

### 9 10 **Waist Circumference**

11  
12 Fifteen RCTs of very low GRADE quality with a total of 20,796 participants found a benefit of  
13  
14 the intervention over the control group on waist circumference [MD (95% CI) -0.95 cm (-1.27, -  
15  
16 0.63)] (see Table 2).  
17  
18

### 19 20 **Percent Body Fat**

21  
22 Considering total % body fat, six RCTs of low GRADE quality that included 1,663 participants  
23  
24 found that the intervention group had less body fat than the controls at the end of the  
25  
26 interventions [MD (95% CI) -1.27 % (-1.93, -0.61)] (see Table 2) .  
27  
28

### 29 30 **Secondary Outcomes**

31  
32 Pooled effect estimates for some secondary health outcomes were significant in favour of the  
33  
34 interventions. At the post-intervention point, compared to the control group, intervention  
35  
36 participants had reduced their total cholesterol by an additional 0.06 mmol/L (95% CI -0.11, -  
37  
38 0.01), lowered their LDL level by an additional 0.06 mmol/L (95% CI -0.09, -0.03), and reduced  
39  
40 their fasting glucose level by 0.04 mmol/L more (95% CI -0.08, -0.0016). These effect sizes are  
41  
42 not clinically meaningful. No statistically significant results were found for the effect of the  
43  
44 interventions on systolic or diastolic blood pressure or on the likelihood of being diagnosed with  
45  
46 T2D (see Tables 3 and 4).  
47  
48  
49  
50  
51  
52  
53  
54  
55  
56  
57  
58  
59  
60

## Harms

No harms of interest to this review were reported. Only six studies mentioned adverse effects, half of which<sup>27,30,32,36,38,43</sup> reported no adverse events associated with participation, two showed no significant differences between exercisers and those in the control groups in terms of injuries, falls or serious adverse events, and only one study found significantly more falls and injuries were sustained by those taking part in the exercise program compared to control group participants.

## Maintenance of weight or health outcomes

Only one study of a 9-month exercise intervention was available to address the question about the long-term benefits of weight gain prevention programs. There was a statistically significant increase ( $P < 0.00001$ ) in weight in the intervention group as compared to the control group from the point of intervention completion to 15 months later [MD (95% CI) 0.20 kg (0.17, 0.23)]. For the same comparison and the same time period, there was no statistically significant difference ( $P = 1.00$ ) in waist circumference; instead, both groups increased on this measure by 1.4 cm. None of the benefits in terms of reduced total cholesterol, fasting glucose and systolic blood pressure levels that were observed in intervention participants at the end of the program were maintained over the next 15 months. The intervention group showed significantly greater increases in all three outcomes compared to the control group at the follow-up assessment point.

## Interpretation

To our knowledge, this is the first meta-analysis of prevention of obesity in adults. Gaining <0.5 kg over one year may not appear clinically meaningful<sup>8</sup> but this should be considered with regard to expected weight gain that typically occurs in adults (3-4 kg in 8 years)<sup>7</sup> and the associated obesity-related health problems.<sup>2-6</sup>

Weight gain prevention programs targeting normal weight adults would expect to demonstrate weight maintenance in the intervention participants compared to a hypothesized increase in weight<sup>8</sup> in control group participants. In this review we considered four measures of weight gain prevention: weight; BMI; waist circumference; and total % body fat. Across studies, interventions were successful in stabilizing weight and, in some cases, conferred weight loss by the end of the interventions. In many studies, those in the control groups also lost weight but a smaller amount than intervention participants. These results are consistent with the review by Hutfless et al.<sup>15</sup>, although their inclusion/exclusion criteria and some outcomes differed.

For adults in an overweight or obese category, these changes do not represent clinically meaningful reductions in weight. However, this was not the goal of these interventions, which was to prevent weight gain. With that goal, the benefits of these interventions could become apparent over time but long-term follow-up data are not available to draw such conclusions.

Sensitivity analyses performed on studies providing weight in kg and BMI data found no significant differences between any sub-groups. None of the specified categorizations (i.e., type of behavioral intervention, duration of intervention, gender, baseline CVD risk status, baseline mean BMI, and study risk of bias rating) explain the variation across this evidence. The



1  
2  
3 moderate to high statistical heterogeneity across studies in most sub-analyses is most likely due  
4  
5 to small versus large treatment effects observed across studies.  
6  
7

8  
9 Most of the studies were assessed as having unclear or high risk of bias, primarily due to the lack  
10  
11 of information about or lack of procedures to ensure random sequence generation, allocation  
12  
13 concealment and/or blinding of outcome assessment as well as other sources of bias (i.e.,  
14  
15 industry funding, imbalance in baseline characteristics and/or selection bias). Due to the nature  
16  
17 of behavioral interventions, there is a high risk of bias for blinding of participants and personnel  
18  
19 across all studies.  
20  
21

22  
23 As noted, only one pilot study addressed a normal weight population. All other data in this  
24  
25 review is taken from studies with mixed weight populations, and thus constitutes only indirect  
26  
27 evidence for primary prevention of adult overweight and obesity.  
28  
29

30  
31 Results presented for the secondary health outcomes (total cholesterol, LDL, fasting glucose,  
32  
33 blood pressure, incidence of T2D) should be considered with caution as we did not conduct a full  
34  
35 systematic review for these components. To be included in this review studies had to report data  
36  
37 for the primary outcome of weight; therefore any investigations of relevant interventions that  
38  
39 examined the secondary outcomes but did not provide weight data were excluded. Finally, we  
40  
41 restricted our search to papers in English or French, thus we may have missed the papers written  
42  
43 in other languages.  
44  
45  
46

47  
48 Interpreting these results is challenging. People who were motivated to join a weight gain  
49  
50 prevention program not only did not gain weight, but actually lost a small amount of weight.  
51

52  
53 These benefits were also achieved without experiencing serious adverse effects. For participants  
54  
55 who were of normal weight to begin with, we cannot know if this small weight loss was  
56  
57 clinically meaningful, except to note that they are not increasing health risks associated with  
58  
59  
60

1  
2  
3 weight gain. It is difficult to know how primary care practitioners might motivate normal weight  
4  
5  
6 people to consider participating in such interventions.  
7

8  
9 In summary, this review was unable to conclusively determine if behaviorally-based primary  
10  
11 care relevant prevention interventions lead to short-term or sustained weight gain prevention and  
12  
13 improved health outcomes in normal weight adults. Intervention research involving normal  
14  
15 weight samples with long term follow-up is required to effectively answer this question.  
16  
17  
18  
19  
20  
21  
22  
23  
24  
25  
26  
27  
28  
29  
30  
31  
32  
33  
34  
35  
36  
37  
38  
39  
40  
41  
42  
43  
44  
45  
46  
47  
48  
49  
50  
51  
52  
53  
54  
55  
56  
57  
58  
59  
60

Confidential

## Reference List

1. World Health Organization. Obesity and overweight. <http://www.who.int/mediacentre/factsheets/fs311/en/>. 2011 March
2. Eckersley RM. Losing the battle of the bulge: Causes and consequences of increasing obesity. *Med J Aust.* 2001; 174(11): 590-2.
3. Mokdad AH, Ford ES, Bowman BA, Dietz WH, Vinicor F, Bales VS, and Marks JS. Prevalence of obesity, diabetes, and obesity-related health risk factors, 2001. *JAMA.* 2003; 289(1): 76-9.
4. Wilson PW, D'Agostino RB, Sullivan L, Parise H, and Kannel WB. Overweight and obesity as determinants of cardiovascular risk: the Framingham experience. *Arch Intern Med.* 2002; 162(16): 1867-72.
5. Flegal KM, Graubard BI, Williamson DF, and Gail MH. Excess deaths associated with underweight, overweight, and obesity. *JAMA.* 2005; 293(15): 1861-7.
6. Allison DB, Fontaine KR, Manson JE, Stevens J, and VanItallie TB. Annual deaths attributable to obesity in the United States. *JAMA.* 1999; 282(16): 1530-8.
7. Orpana HM, Tremblay MS, and Finès P. Trends in weight change among Canadian adults. *Health Rep.* 2007; 18(2): 9-16.
8. Mozaffarian D, Hao T, Rimm EB, Willett WC, and Hu FB. Changes in diet and lifestyle and long-term weight gain in women and men. *N Engl J Med.* 2011; 364(25): 2392-404.
9. National Health and Medical Research Council. Clinical practice guidelines for the management of overweight and obesity in adults. Australia: National Health and Medical Research Council; 2003. Available at: [http://health.gov.au/internet/main/publishing.nsf/Content/7AF116AFD4E2EE3DCA256F190003B91D/\\$File/adults.pdf](http://health.gov.au/internet/main/publishing.nsf/Content/7AF116AFD4E2EE3DCA256F190003B91D/$File/adults.pdf).
10. Ministry of Health CTRU. Clinical guidelines for weight management in New Zealand adults. Wellington, New Zealand: Ministry of Health; 2009. HP 5014. Available at: <http://www.moh.govt.nz>.
11. Scottish Intercollegiate Guidelines Network. Management of obesity: a national clinical guideline. Edinburgh, Scotland: Scottish Intercollegiate Guidelines Network (SIGN); 2010. 115. Available at: <http://www.sign.ac.uk/pdf/sign115.pdf>.
12. Moyer VA and U.S.Preventive Services Task Force. Screening for and management of obesity in adults: U.S. Preventive Services Task Force recommendation statement. *Ann Intern Med.* 2011; 157(5): 373-8.
13. Lau DC, Douketis JD, Morrison KM, Hramiak IM, Sharma AM, Ur E, and Obesity Canada Clinical Practice Guidelines Expert Panel. 2006 Canadian clinical practice guidelines on the management and prevention of obesity in adults and children [summary]. *CMAJ.* 2007; 176(8): S1-13.
14. Brown TJ. Obesity: guidance on the prevention, identification, assessment and management of overweight and obesity in adults and children. London, UK: National Institute of Health and Clinical Excellence (NICE); 2006. NICE Clinical Guideline 43. Available at: <http://www.nice.org.uk/nicemedia/pdf/cg43niceguideline.pdf>.
15. Hutflless S, Gudzone KA FAU - Maruthur N, Maruthur NF, Wilson RF FAU - Bleich S, Bleich SN FAU - Lau B, Lau BD FAU - Fawole O, Fawole OA FAU - Anderson C, Anderson CA FAU - Segal J, and Segal J. Strategies to prevent weight gain in adults: a systematic review. *Am J Prev Med.* 2013; 45(6): e41-51.
16. Distiller (DistillerSR systematic review software) [computer program]. Ottawa, ON: Evidence Partners; 2008. Available at: <http://systematic-review.net/>.

- 1
- 2
- 3 17. Review Manager (RevMan) [Computer Program]. Version 5.1. Copenhagen: The Nordic Cochrane Centre, The
- 4 Cochrane Collaboration; 2011.
- 5
- 6 18. Brozek, J., Oxman, A., and Schünemann, H. GRADEpro. [Computer program]. Version 3.2 for Windows.;
- 7 2008.
- 8
- 9 19. GRADE working group.; 2000. Available at: <http://www.gradeworkinggroup.org/>.
- 10
- 11 20. DerSimonian R and Laird N. Meta-analysis in clinical trials. *Control Clin Trials*. 1986; 7(3): 177-88.
- 12
- 13 21. Deeks JJ, Higgins JP, Altman DG, and the Cochrane Methods Group. Analysing data and undertaking meta-
- 14 analyses. *Cochrane Handbook for Systematic Reviews of Interventions 5.0.2 (Updated September 2009)*.
- 15 Version 5.0.2 ed. Chichester, UK: John Wiley & Sons, Ltd.; 2009. Chapter 9.
- 16
- 17 22. Egger M, Davey SG, Schneider M, and Minder C. Bias in meta-analysis detected by a simple, graphical test.
- 18 *BMJ*. 1997; 315(7109): 629-34.
- 19
- 20 23. Forster JL, Jeffery RW, Schmid TL, and Kramer FM. Preventing weight gain in adults: a pound of prevention.
- 21 *Health Psychol*. 1988; 7(6): 515-25.
- 22
- 23 24. Hivert MF, Langlois MF, Bérard P, Cuerrier JP, and Carpentier AC. Prevention of weight gain in young adults
- 24 through a seminar-based intervention program. *Int J Obes*. 2007; 31(8): 1262-9.
- 25
- 26 25. Sone H, Katagiri A, Ishibashi S, Abe R, Saito Y, Murase T, Yamashita H, Yajima Y, Ito H, Ohashi Y,
- 27 Akanuma Y, Yamada N, and JD Study Group. Effects of lifestyle modifications on patients with type 2
- 28 diabetes: the Japan Diabetes Complications Study (JDACS) study design, baseline analysis and three year-
- 29 interim report. *Horm Metab Res*. 2002; 34(9): 509-15.
- 30
- 31 26. Babazono A, Kame C, Ishihara R, Yamamoto E, and Hillman AL. Patient-motivated prevention of lifestyle-related
- 32 disease in Japan: a randomized, controlled clinical trial. *Dis Manag Health Out*. 2007; 15(2): 119-26.
- 33
- 34 27. Sacerdote C, Fiorini L, Rosato R, Audenino M, Valpreda M, and Vineis P. Randomized controlled trial: effect
- 35 of nutritional counselling in general practice. *Int J Epidemiol*. 2006; 35(2): 409-15.
- 36
- 37 28. Wister A, Loewen N, Kennedy-Symonds H, McGowan B, McCoy B, and Singer J. One-year follow-up of a
- 38 therapeutic lifestyle intervention targeting cardiovascular disease risk. *CMAJ*. 2007; 177(8): 859-65.
- 39
- 40 29. Kanaya AM, Santoyo-Olsson J, Gregorich S, Grossman M, Moore T, and Stewart AL. The Live Well, Be Well
- 41 study: a community-based, translational lifestyle program to lower diabetes risk factors in ethnic minority
- 42 and lower-socioeconomic status adults. *Am J Public Health*. 2012; 102(8): 1551-8.
- 43
- 44 30. Eriksson MK, Franks PW, and Eliasson M. A 3-year randomized trial of lifestyle intervention for
- 45 cardiovascular risk reduction in the primary care setting: the Swedish Bjorknas study. *PLoS One*. 2009;
- 46 4(4): e5195.
- 47
- 48 31. Khare MM, Carpenter RA, Huber R, Bates NJ, Cursio JF, Balmer PW, Nolen KN, Hudson H, Shippee SJ, and
- 49 Loo RK. Lifestyle intervention and cardiovascular risk reduction in the Illinois WISEWOMAN Program. *J*
- 50 *Womens Health (Larchmt)*. 2012; 21(3): 294-301.
- 51
- 52 32. Elley CR, Kerse N, Arroll B, and Robinson E. Effectiveness of counselling patients on physical activity in
- 53 general practice: cluster randomised controlled trial. *BMJ*. 2003; 326(7393): 793.
- 54
- 55 33. Carty CL, Kooperberg C, Neuhaus ML, Tinker L, Howard B, Wactawski-Wende J, Beresford SA, Snetselear
- 56 L, Vitolins M, Allison M, Budrys N, Prentice R, and Peters U. Low-fat dietary pattern and change in body-
- 57 composition traits in the Women's Health Initiative Dietary Modification Trial. *Am J Clin Nutr*. 2011;
- 58 93(3): 516-24.
- 59
- 60 34. Levine MD, Klem ML, Kalarchian MA, Wing RR, Weissfeld L, Qin L, and Marcus MD. Weight gain
- prevention among women. *Obesity*. 2007; 15(5): 1267-77.

- 1  
2  
3 35. Simkin-Silverman LR, Wing RR, Boraz MA, and Kuller LH. Lifestyle intervention can prevent weight gain  
4 during menopause: results from a 5-year randomized clinical trial. *Ann Behav Med.* 2003; 26(3): 212-20.  
5  
6 36. Friedenreich CM, Woolcott CG, McTiernan A, Terry T, Brant R, Ballard-Barbash R, Irwin ML, Jones CA,  
7 Boyd NF, Yaffe MJ, Campbell KL, McNeely ML, Karvinen KH, and Courneya KS. Adiposity changes  
8 after a 1-year aerobic exercise intervention among postmenopausal women: a randomized controlled trial.  
9 *Int J Obes.* 2011; 35(3): 427-35.  
10  
11 37. Velthuis MJ, Schuit AJ, Peeters PH, and Monninkhof EM. Exercise program affects body composition but not  
12 weight in postmenopausal women. *Menopause (New York, NY).* 2009; 16(4): 777-84.  
13  
14 38. Lawton BA, Rose SB, Elley CR, Dowell AC, Fenton A, and Moyes SA. Exercise on prescription for women  
15 aged 40-74 recruited through primary care: two year randomised controlled trial. *BMJ.* 2008; 337: a2509.  
16  
17 39. Werkman A, Hulshof PJ, Stafleu A, Kremers SP, Kok FJ, Schouten EG, and Schuit AJ. Effect of an  
18 individually tailored one-year energy balance programme on body weight, body composition and lifestyle  
19 in recent retirees: a cluster randomised controlled trial. *BMC Public Health.* 2010; 10(1): 110.  
20  
21 40. Kastarinen MJ, Puska PM, Korhonen MH, Mustonen JN, Salomaa VV, Sundvall JE, Tuomilehto JO, Uusitupa  
22 MI, Nissinen AM, and LIHEF Study Group. Non-pharmacological treatment of hypertension in primary  
23 health care: a 2-year open randomized controlled trial of lifestyle intervention against hypertension in  
24 eastern Finland. *J Hypertens.* 2002; 20(12): 2505-12.  
25  
26 41. Broekhuizen K, van Poppel MN, Koppes LL, Kindt I, Brug J, and van Mechelen W. No significant  
27 improvement of cardiovascular disease risk indicators by a lifestyle intervention in people with familial  
28 hypercholesterolemia compared to usual care: results of a randomised controlled trial. *BMC Res Notes.*  
29 2012; 5: 181.  
30  
31 42. Steptoe A, Doherty S, Rink E, Kerry S, Kendrick T, and Hilton S. Behavioural counselling in general practice  
32 for the promotion of healthy behaviour among adults at increased risk of coronary heart disease:  
33 randomised trial. *BMJ.* 1999; 319(7215): 943-7.  
34  
35 43. Imayama I, Alfano CM, Cadmus Bertram LA, Wang C, Xiao L, Duggan C, Campbell KL, Foster-Schubert KE,  
36 and McTiernan A. Effects of 12-month exercise on health-related quality of life: a randomized controlled  
37 trial. *Prev Med.* 2011; 52(5): 344-51.  
38  
39 44. Harris MF, Fanaian M, Jayasinghe UW, Passey ME, McKenzie SH, Davies GP, Lyle DM, Laws RA, Schütze  
40 H, and Wan Q. A cluster randomised controlled trial of vascular risk factor management in general  
41 practice. *Med J Aust.* 2012; 197(7): 387-93.  
42  
43 45. Mensink M, Blaak EE, Corpeleijn E, Saris WH, de Bruin TW, and Feskens EJ. Lifestyle intervention according  
44 to general recommendations improves glucose tolerance. *Obes Res.* 2003; 11(12): 1588-96.  
45  
46 46. Roderick P, Ruddock V, Hunt P, and Miller G. A randomized trial to evaluate the effectiveness of dietary  
47 advice by practice nurses in lowering diet-related coronary heart disease risk. *Br J Gen Pract.* 1997;  
48 47(414): 7-12.  
49  
50 47. Vermunt PWA, Milder IEJ, Wielaard F, de Vries JHM, Baan CA, van Oers JAM, and Westert GP. A lifestyle  
51 intervention to reduce Type 2 diabetes risk in Dutch primary care: 2.5-year results of a randomized  
52 controlled trial. *Diabet Med.* 2012; 29(8): e223-31.  
53  
54  
55  
56  
57  
58  
59  
60

Figure 1: Meta-analysis of Weight Gain Prevention Interventions on Weight (kg)

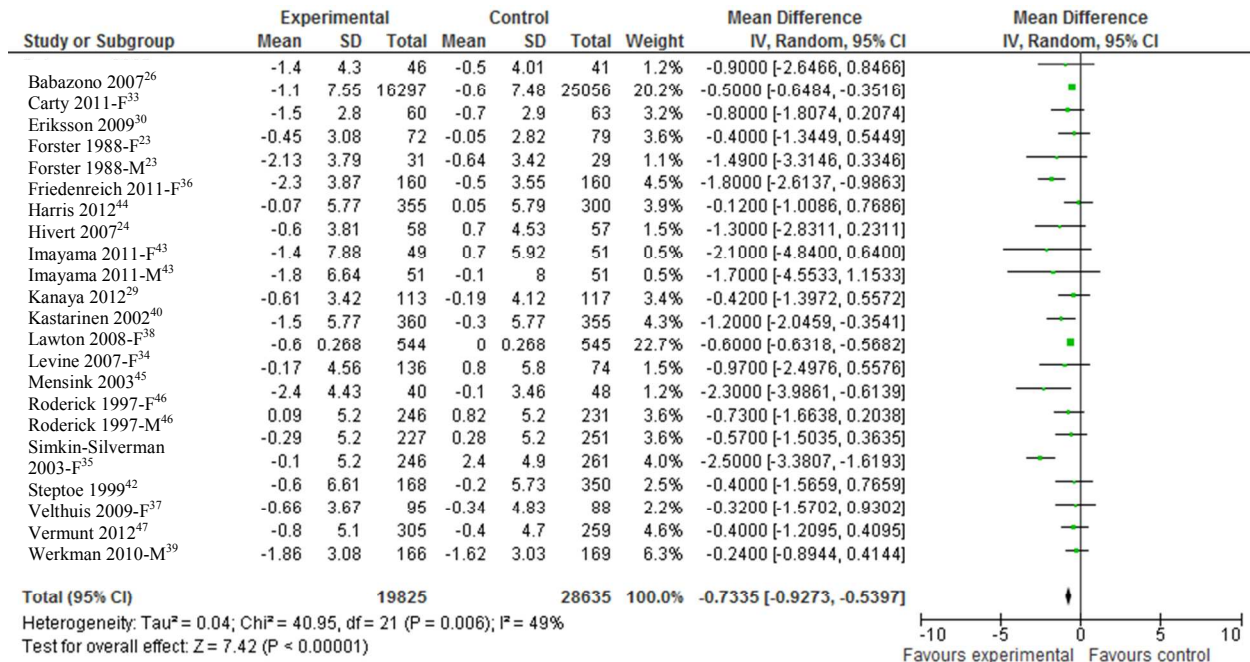

**Table 1: Change in Weight (KG)**

| Group or Sub-group              | Meta-analysis, Mean difference, weight in kg (95% CI) | Sub-group Differences | No. Participants | No. Studies | GRADE Rating* |
|---------------------------------|-------------------------------------------------------|-----------------------|------------------|-------------|---------------|
| <b>Overall</b>                  | -0.73 (-0.93 to -0.54)                                |                       | 48,460           | 19          | Very Low      |
| <b>Type - Diet</b>              | -0.51 (-0.65 to -0.36)                                | P=0.25                | 42,308           | 2           | Low           |
| <b>Type - Exercise</b>          | -0.88 (-1.44 to -0.33)                                |                       | 2,024            | 5           | Low           |
| <b>Type - Diet + Exercise</b>   | -0.99 (-1.90 to -0.08)                                |                       | 748              | 4           | Low           |
| <b>Type - Lifestyle</b>         | -0.89 (-1.44 to -0.34)                                |                       | 3,380            | 8           | Low           |
| <b>Duration &lt;= 12 Months</b> | -0.61 (-0.70 to -0.51)                                | P=0.08                | 4,908            | 12          | Low           |
| <b>Duration &gt; 12 Months</b>  | -1.21 (-1.88 to -0.54)                                |                       | 43,552           | 7           | Low           |
| <b>Gender - Male</b>            | -0.48 (-0.99 to 0.03)                                 | P=0.25                | 975              | 4           | Very Low      |
| <b>Gender - Female</b>          | -0.82 (-1.09 to -0.55)                                |                       | 44,390           | 9           | Low           |
| <b>High CVD Risk</b>            | -0.88 (-1.45 to -0.32)                                | P=0.60                | 1,356            | 3           | Low           |
| <b>No/Low CVD Risk</b>          | -0.72 (-0.93 to -0.52)                                |                       | 47,104           | 16          | Very Low      |
| <b>High Risk Of Bias</b>        | -1.20 (-3.04 to 0.64)                                 | P=0.29                | 652              | 2           | Very Low      |
| <b>Unclear Risk of Bias</b>     | -0.53 (-0.67 to -0.40)                                |                       | 45,237           | 13          | Very Low      |
| <b>Low Risk of Bias</b>         | -1.22 (-2.16 to -0.28)                                |                       | 2,571            | 4           | Low           |

\*Low=downgraded for risk of bias and indirectness

Very Low=downgraded for risk of bias, indirectness and reporting bias

1  
2  
3  
4  
5  
6  
7  
8  
9  
10  
11  
12  
13  
14  
15  
16  
17  
18  
19  
20  
21  
22  
23  
24  
25  
26  
27  
28  
29  
30  
31  
32  
33  
34  
35  
36  
37  
38  
39  
40  
41  
42  
43  
44  
45  
46  
47  
48  
49

**Table 2: Changes in BMI, Waist Circumference, % Body Fat**

| Group or Sub-group                                                 | Meta-analyses: mean difference (95% CI) | Sub-group Differences | No. Participants | No. Studies | GRADE Rating* |
|--------------------------------------------------------------------|-----------------------------------------|-----------------------|------------------|-------------|---------------|
| <b>Overall</b>                                                     | -0.24 (-0.34 to -0.15)                  |                       | 52,243           | 20          | Low           |
| <b>Baseline Mean BMI - Normal Weight (&lt;25 kg/m<sup>2</sup>)</b> | -0.27 (-0.50 to -0.05)                  | P=0.81                | 5,152            | 4           | Low           |
| <b>Baseline Mean BMI - Overweight/Obese (≥25 kg/m<sup>2</sup>)</b> | -0.24 (-0.36 to -0.12)                  |                       | 47,091           | 16          | Low           |
| <b>Outcome: Waist Circumference (cm)</b>                           |                                         |                       |                  |             |               |
| <b>Overall</b>                                                     | -0.95 (-1.27 to -0.63)                  |                       | 20,796           | 15          | Very Low      |
| <b>Outcome: Total % Body Fat</b>                                   |                                         |                       |                  |             |               |
| <b>Overall</b>                                                     | -1.27 (-1.93 to -0.61)                  |                       | 1,663            | 6           | Low           |

\*Low=downgraded for risk of bias and indirectness  
 Very Low=downgraded for risk of bias, indirectness and reporting bias



**Table 3: Changes in Total Cholesterol, LDL, Fasting Glucose and Blood Pressure**

| Outcome                           | Meta-analyses: mean difference<br>(95% CI) | No.<br>Participants | No.<br>Studies | GRADE<br>Rating* |
|-----------------------------------|--------------------------------------------|---------------------|----------------|------------------|
| <b>Total Cholesterol (mmol/L)</b> | -0.06 (-0.11 to -0.01)                     | 10,660              | 15             | Low              |
| <b>LDL (mmol/L)</b>               | -0.06 (-0.09 to -0.03)                     | 5,635               | 11             | Low              |
| <b>Fasting Glucose (mmol/L)</b>   | -0.04 (-0.08 to -0.0016)                   | 7,189               | 10             | Low              |
| <b>SBP (mmHg)</b>                 | -0.31 (-0.84 to 0.22)                      | 48,493              | 17             | Very Low         |
| <b>DBP (mmHg)</b>                 | -0.18 (-0.44 to 0.07)                      | 47,945              | 15             | Very Low         |

\*Low=downgraded for risk of bias and indirectness

Very Low=downgraded for risk of bias, indirectness and imprecision

1  
2  
3  
4  
5  
6  
7  
8  
9  
10  
11  
12  
13  
14  
15  
16  
17  
18  
19  
20  
21  
22  
23  
24  
25  
26  
27  
28  
29  
30  
31  
32  
33  
34  
35  
36  
37  
38  
39  
40  
41  
42  
43  
44  
45  
46  
47  
48  
49

**Table 4: Change in Type 2 Diabetes Incidence**

| Outcome              | Relative Effect (95% CI)  | Absolute Number per thousand (Range) | ARR   | NNT | No. Participants | No. Studies | GRADE Rating* |
|----------------------|---------------------------|--------------------------------------|-------|-----|------------------|-------------|---------------|
| <b>T2D Incidence</b> | RR 0.95<br>(0.89 to 1.02) | 3 fewer<br>(from 8 fewer to 2 more)  | 0.34% | 293 | 46,537           | 2           | Very Low      |

\* Very Low=downgraded for risk of bias, indirectness and imprecision

Confidential

## Adult Obesity Prevention - Supplemental File

Figure 1: Study Flow Diagram

Table 1: Summary of Risk of Bias Assessment

Table 2: Characteristics of Included Studies

Table 3: Search Strategy - Medline

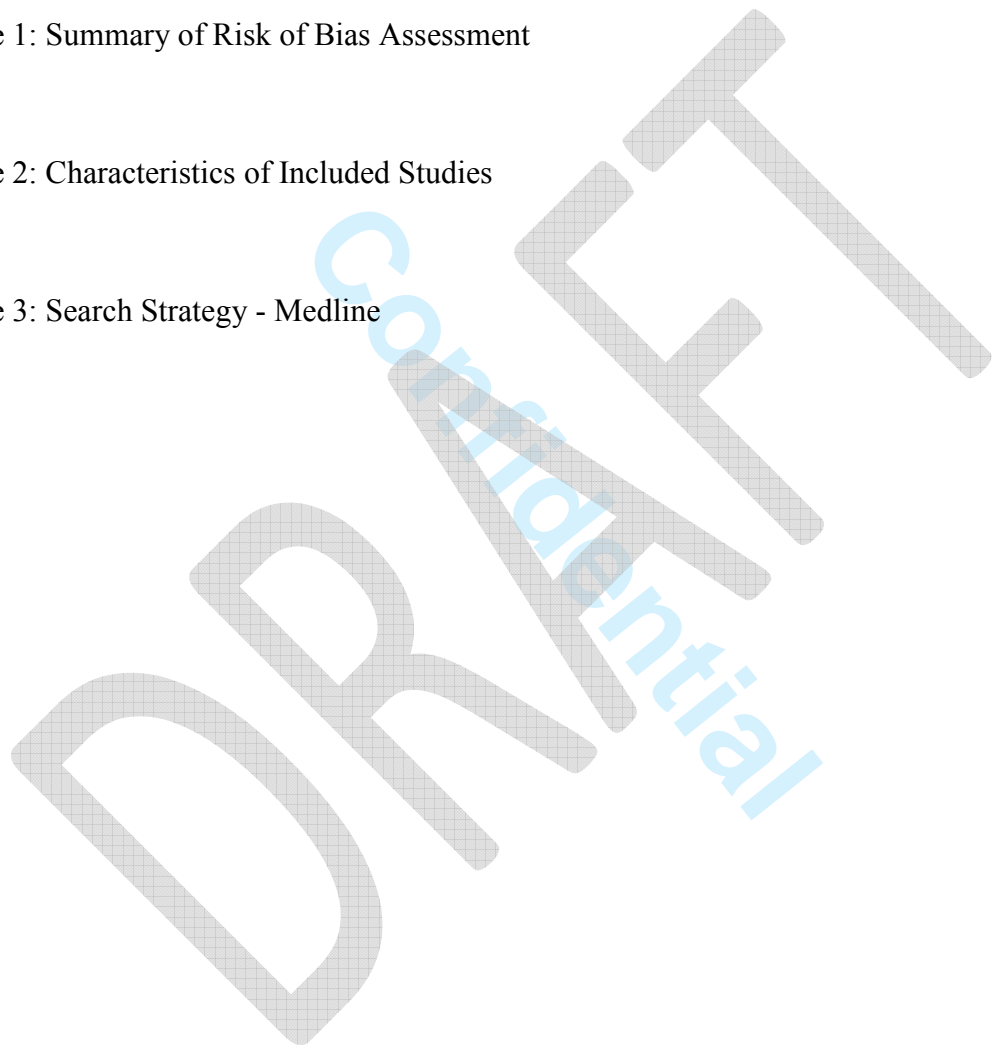

1  
2  
3  
4  
5  
6  
7  
8  
9  
10  
11  
12  
13  
14  
15  
16  
17  
18  
19  
20  
21  
22  
23  
24  
25  
26  
27  
28  
29  
30  
31  
32  
33  
34  
35  
36  
37  
38  
39  
40  
41  
42  
43  
44  
45  
46  
47  
48  
49  
50  
51  
52  
53  
54  
55  
56  
57  
58  
59  
60

**Figure 1 a: Initial Comprehensive Search Results**

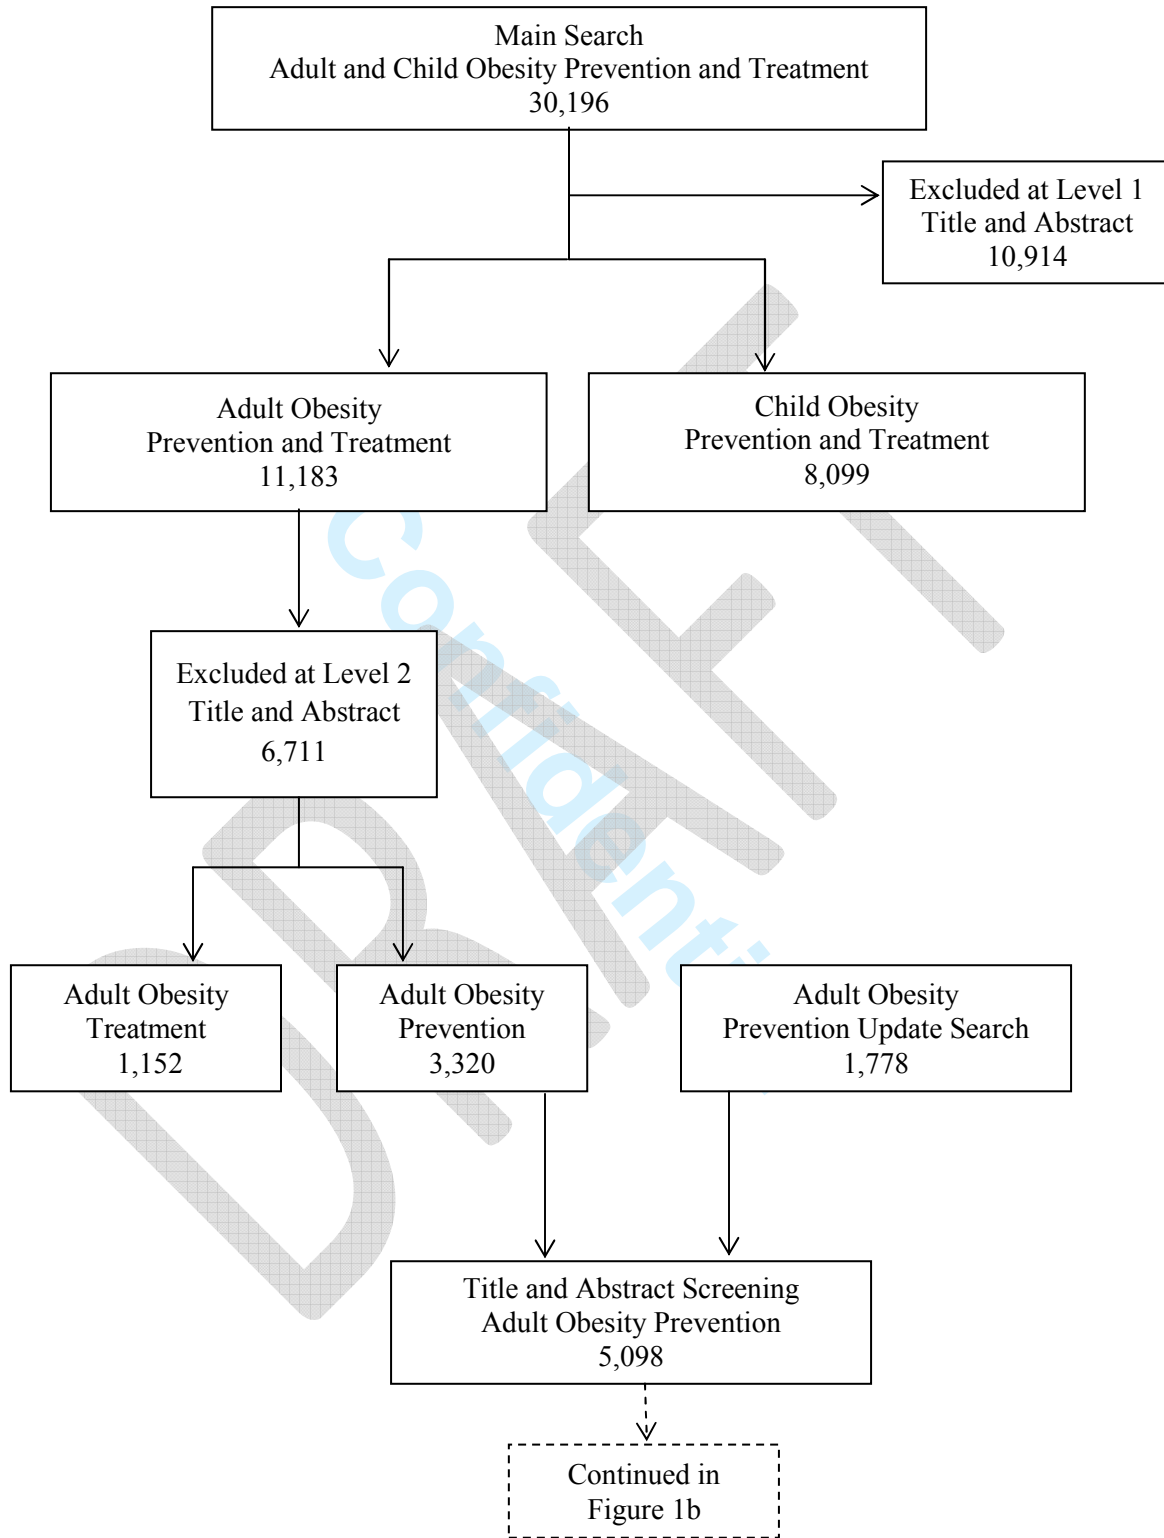

Figure 1b: Adult Overweight/Obesity Prevention Search Results

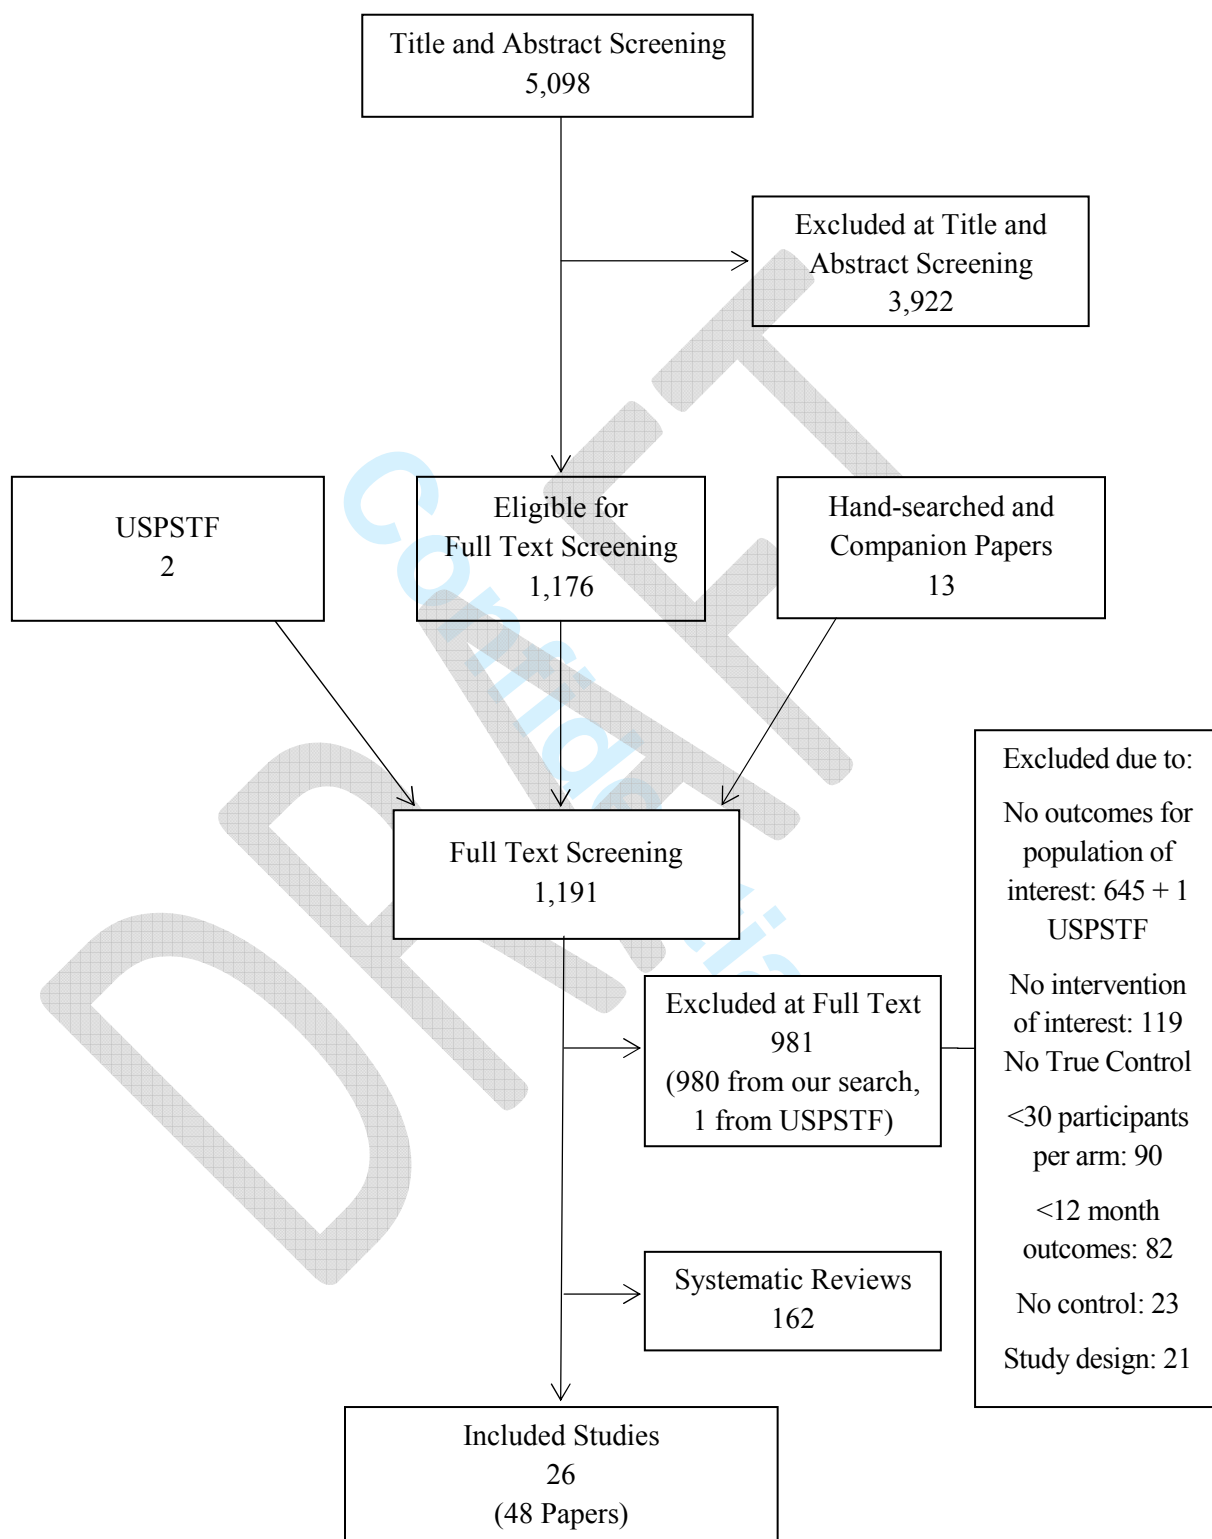

**Table 1: Summary of Risk of Bias Assessment of Included RCTs Using Cochrane's Risk of Bias Tool<sup>1</sup>**

| Study                               | Sequence Generation | Allocation Concealment | Blinding of Outcome Assessors |      |     | Incomplete Reporting |      |     | Selective Reporting | Other Bias | Overall Risk of Bias |      |     |
|-------------------------------------|---------------------|------------------------|-------------------------------|------|-----|----------------------|------|-----|---------------------|------------|----------------------|------|-----|
|                                     |                     |                        | O BJ                          | SU B | S-R | O B                  | SU B | S-R |                     |            | O BJ                 | SU B | S-R |
| Babazono 2007 <sup>2</sup>          | U                   | U                      | L                             | U    |     | L                    | L    |     | L                   | H          | U                    | U    |     |
| Broekhuizen 2012 <sup>3</sup>       | L                   | L                      | L                             | U    |     | L                    | L    |     | L                   | U          | L                    | U    |     |
| Burke 2003 <sup>4</sup>             | L                   | U                      | L                             | U    |     | H                    | H    |     | L                   | U          | U                    | U    |     |
| Carty 2011 <sup>5</sup>             | L                   | U                      | L                             | L    |     | H                    | L    |     | L                   | U          | U                    | U    |     |
| Elley 2003 <sup>6</sup>             | U                   | U                      | L                             | U    |     | L                    | L    |     | L                   | U          | U                    | U    |     |
| Eriksson 2009 <sup>7</sup>          | L                   | L                      | L                             | U    | H   | L                    | L    | L   | L                   | U          | L                    | U    | U   |
| Forster 1988 <sup>8</sup>           | U                   | U                      |                               | U    |     |                      | L    |     | L                   | H          |                      | U    |     |
| Friedenreich 2011 <sup>9</sup>      | L                   | L                      | L                             | L    |     | L                    | L    |     | L                   | H          | L                    | L    |     |
| Harris 2012 <sup>10</sup>           | L                   | U                      |                               | L    |     |                      | L    |     | L                   | L          |                      | L    |     |
| Hivert 2007 <sup>11</sup>           | L                   | L                      | L                             | U    |     | L                    | L    |     | L                   | U          | L                    | U    |     |
| Imayama 2011 <sup>12</sup>          | L                   | U                      | L                             | L    |     | L                    | L    |     | L                   | H          | U                    | U    |     |
| Kanaya 2012 <sup>13</sup>           | L                   | L                      | L                             | U    |     | L                    | L    |     | L                   | U          | L                    | U    |     |
| Kastarinen 2002 <sup>14</sup>       | L                   | U                      | L                             | L    |     | L                    | L    |     | L                   | U          | U                    | U    |     |
| Khare 2012 <sup>15</sup>            | U                   | U                      | L                             | U    |     | H                    | H    |     | L                   | H          | U                    | U    |     |
| Lawton 2008 <sup>16</sup>           | L                   | L                      | L                             | L    |     | L                    | L    |     | L                   | U          | L                    | L    |     |
| Levine 2007 <sup>17</sup>           | U                   | U                      |                               | U    |     |                      | L    |     | L                   | H          |                      | U    |     |
| Mensink 2003 <sup>18</sup>          | U                   | U                      | L                             | U    |     | H                    | H    |     | H                   | H          | H                    | H    |     |
| Roderick 1997 <sup>19</sup>         | U                   | U                      | L                             | U    |     | L                    | L    |     | L                   | U          | U                    | U    |     |
| Sacerdote 2006 <sup>20</sup>        | L                   | U                      |                               | H    |     |                      | L    |     | L                   | U          |                      | U    |     |
| Simkin-Silverman 2003 <sup>21</sup> | L                   | L                      | L                             | L    |     | L                    | L    |     | L                   | L          | L                    | L    |     |
| Sone 2002 <sup>22</sup>             | U                   | U                      | L                             | H    |     | L                    | L    |     | U                   | U          | U                    | U    |     |
| Stephoe 1999 <sup>23</sup>          | U                   | U                      | L                             | U    |     | H                    | H    |     | L                   | L          | U                    | U    |     |
| Velthuis 2009 <sup>24</sup>         | U                   | U                      | L                             | U    |     | L                    | L    |     | H                   | H          | U                    | U    |     |
| Vermunt 2012 <sup>25</sup>          | H                   | H                      | L                             | U    |     | H                    | H    |     | L                   | H          | H                    | H    |     |
| Werkman 2010 <sup>26</sup>          | U                   | L                      |                               | H    |     |                      | L    |     | L                   | H          |                      | U    |     |
| Wister 2007 <sup>27</sup>           | L                   | L                      | L                             | L    | H   | L                    | L    | L   | L                   | U          | L                    | L    | U   |

L (green) = Low Risk; U (yellow) = Unclear Risk; H (red) = High Risk; OBJ = Objective Outcome; SUB = Subjective Outcome; S-R = Self-Reported Outcome

Table 2: Characteristics of Included Studies

|                       |                                                                                                                                                                                                                                                                                                                                                                   |
|-----------------------|-------------------------------------------------------------------------------------------------------------------------------------------------------------------------------------------------------------------------------------------------------------------------------------------------------------------------------------------------------------------|
| <b>Study/Location</b> | Babazano 2007 <sup>2</sup> Japan                                                                                                                                                                                                                                                                                                                                  |
| <b>Objective</b>      | To determine whether patient-motivated lifestyle changes would better enhance healthcare outcomes compared with usual care                                                                                                                                                                                                                                        |
| <b>Methods</b>        | Design: RCT<br>Selection: participants were members of the National Health Insurance in Umi Town, Fukuoka, Japan. Patients meeting inclusion criteria were sent invitation letters<br>Inclusion criteria: SBP 130-150mmHg; DBP 85-99mmHg or HbA1c $\geq$ 5.6%<br>Exclusion criteria: Persons with critical need for medical treatment                             |
| <b>Participants</b>   | Sample n = 99<br>Intervention group n = 50; Control group n = 49<br>Age: Mean age Intervention (SD): 64.3 (7.1); Mean age Control (SD): 64.5 (7.9)<br>Gender [Female n(%)]: Intervention 29 (58%); Control 28 (51.1%)<br>Loss to follow-up: Intervention n = 4; Control n = 8                                                                                     |
| <b>Intervention</b>   | Intervention: group had a support team of dietitians, health exercise instructors, and public health nurses who encouraged patients to set goals and to select their own lifestyle improvements. Follow-up support was performed twice during the first year<br>Control: usual care<br>Duration of intervention: 12 months<br>Length of follow-up: immediate post |
| <b>Study/Location</b> | Broekhuizen 2012 <sup>3</sup> The Netherlands<br><i>Companion paper</i> : Broekhuizen <sup>3</sup>                                                                                                                                                                                                                                                                |
| <b>Objective</b>      | This project evaluated the efficacy of an individualized tailored lifestyle intervention on lipids, systolic blood pressure, glucose, body mass index (BMI) and waist circumference in people with familial hypercholesterolemia (FH)                                                                                                                             |
| <b>Methods</b>        | Design: RCT<br>Selection: recruitment was by invitation brochures<br>Inclusion criteria: participants diagnosed with FH from Jan 1 2007 to Apr 15 2009; aged 18 to 70 years and with a LDL-C level $>75^{\text{th}}$ percentile (age and gender specific) also access to internet; fluency in Dutch and residency $<150\text{KM}$ from Amsterdam                  |
| <b>Participants</b>   | Sample: n = 340<br>Intervention group n = 181; Control group n = 159<br>Age: Mean age Intervention (SD): 44.7 (12.9); Mean age Control (SD): 45.9 (13.0)                                                                                                                                                                                                          |

|                     |                                                                                                                                                                                                                                                                         |
|---------------------|-------------------------------------------------------------------------------------------------------------------------------------------------------------------------------------------------------------------------------------------------------------------------|
|                     | Gender [Female n (%): Intervention: 181(57.1%); Control: 159(56.3%)<br>Loss to follow-up: Intervention n = 11; Control n = 14                                                                                                                                           |
| <b>Intervention</b> | Intervention: personalised health counseling intervention; computer-generated tailored web-based advice and face-to-face counseling with telephone booster session<br>Control: usual care<br>Duration of intervention: 12 months<br>Length of follow-up: immediate post |

|                       |                                                                                                                                                                                                                                                                                                                                                                                                                                                                                                                                                                                                                                                                                                                                                                                        |
|-----------------------|----------------------------------------------------------------------------------------------------------------------------------------------------------------------------------------------------------------------------------------------------------------------------------------------------------------------------------------------------------------------------------------------------------------------------------------------------------------------------------------------------------------------------------------------------------------------------------------------------------------------------------------------------------------------------------------------------------------------------------------------------------------------------------------|
| <b>Study/Location</b> | Burke 2003 <sup>4</sup> Australia<br><i>Companion papers: Dzator,<sup>28</sup> Burke<sup>29, 30</sup></i>                                                                                                                                                                                                                                                                                                                                                                                                                                                                                                                                                                                                                                                                              |
| <b>Objective</b>      | The objective of this study was to compare two methods of delivery of a diet and physical activity program for couples with a 1 year follow up                                                                                                                                                                                                                                                                                                                                                                                                                                                                                                                                                                                                                                         |
| <b>Methods</b>        | Design: RCT<br>Selection: couples recruited by advertisement in the press and through publicity on radio and television programs (did not include couples who took part in the pilot study)<br>Inclusion criteria: couples in Perth, Australia, cohabiting for the first time and for < 2 years, intending to reside in Perth for the length of the study, and not planning a pregnancy during the time of the intervention<br>Exclusion criteria: illnesses such as heart disease, diabetes, or severe asthma                                                                                                                                                                                                                                                                         |
| <b>Participants</b>   | Sample: 137 couples<br>Intervention 1 n= 47 couples; Intervention 2 n=47 couples; Control n=43 couples<br>Age: Mean age Overall (SD): 29.6 years in women (range 18-62); 31.4 years in men (range 20-61)<br>Gender [Female n(%): 50% female<br>Loss to follow-up: 59 couples                                                                                                                                                                                                                                                                                                                                                                                                                                                                                                           |
| <b>Intervention</b>   | Interventions: 16-week program consisting of 6 printed modules focused on nutrition (encouraging consumption of foods low in fat, high in fiber, low in salt) and physical activity (encouraging at least 30 minutes of moderate activity most days and incidental activity); information about the benefits of stopping smoking and drinking alcohol<br>Intervention 1 (high-level): modules every 2 weeks, alternating mail-outs with contact sessions at which the facilitators explained the aim of the modules, demonstrated exercise techniques, answered to questions, and reviewed progress<br>Intervention 2 (low-level): after a single contact session at which the first module was delivered, all other modules were mailed every second week<br>Control: no intervention |



|  |                                                                     |
|--|---------------------------------------------------------------------|
|  | Duration of intervention: 16 weeks<br>Length of follow-up: 36 weeks |
|--|---------------------------------------------------------------------|

|                       |                                                                                                                                                                                                                                                                                                                                                                                                                                                                                                                                                                                                                                                                                                                                                             |
|-----------------------|-------------------------------------------------------------------------------------------------------------------------------------------------------------------------------------------------------------------------------------------------------------------------------------------------------------------------------------------------------------------------------------------------------------------------------------------------------------------------------------------------------------------------------------------------------------------------------------------------------------------------------------------------------------------------------------------------------------------------------------------------------------|
| <b>Study/Location</b> | Carty 2011 <sup>5</sup> US<br><i>Companion papers:</i> Howard, <sup>31, 32</sup> Tinker, <sup>33</sup> Women's Health Initiative Study Group, <sup>34</sup> Hays <sup>35</sup>                                                                                                                                                                                                                                                                                                                                                                                                                                                                                                                                                                              |
| <b>Objective</b>      | To characterize long-term body composition changes associated with a (low-fat) dietary modification trial                                                                                                                                                                                                                                                                                                                                                                                                                                                                                                                                                                                                                                                   |
| <b>Methods</b>        | Design: RCT<br><br>Selection: women aged 50-79 years were enrolled between 1993 and 1998 at 40 clinical centers throughout the United States<br><br>Exclusion criteria: history of breast, colorectal, and other cancers except nonmelanoma skin cancer in previous 10 years; medical conditions predictive of a survival time of <3 years; type I diabetes; high risk of lack of retention or intervention nonadherence; consumption of <600 kcal/day or >5000 kcal/day; consumption of a diet with <32% of total energy from fat; consuming ≥10 main meals/week prepared outside of the home                                                                                                                                                              |
| <b>Participants</b>   | Sample: 48,835<br><br>Intervention n=19,541 ; Control n=29,294<br><br>Age: Mean age Overall (SD): 62.3 (6.9)<br><br>Gender [Female n(%): 100%<br><br>SES: college degree or higher<br><br>Intervention: n=7,445 (38.3%); Control n=11,042 (37.9%)<br><br>Loss to follow-up: Overall n=2027; Intervention n=727; Control n=1300                                                                                                                                                                                                                                                                                                                                                                                                                              |
| <b>Intervention</b>   | Intervention: designed to promote dietary change with the goals of reducing total fat intake to 20% of total energy, increasing vegetable and fruit intake to 5 servings/day and increasing grain intake to 6 servings/day; women received individual fat gram goals and participated in an intensive behavioral modification program consisting of 18 group sessions in the first year and quarterly maintenance sessions until the trial ended in 2005<br><br>Control: asked to maintain usual diet and eating patterns, given copy of "Nutrition and Your Health: Dietary Guidelines for Americans" but no contact with study dietitians<br><br>Duration of intervention: not specified (8-12 years)<br><br>Length of follow-up: 7.5 years post baseline |

|                       |                                                                                                                                                                           |
|-----------------------|---------------------------------------------------------------------------------------------------------------------------------------------------------------------------|
| <b>Study/Location</b> | Elley 2003 <sup>6</sup> New Zealand                                                                                                                                       |
| <b>Objective</b>      | To assess the long term effectiveness of the "green prescription" program, a clinician based initiative in general practice that provides counseling on physical activity |

|                     |                                                                                                                                                                                                                                                                                                                                                                                                                                                                                                                                                                                                                                                                                                                                                                                                                                          |
|---------------------|------------------------------------------------------------------------------------------------------------------------------------------------------------------------------------------------------------------------------------------------------------------------------------------------------------------------------------------------------------------------------------------------------------------------------------------------------------------------------------------------------------------------------------------------------------------------------------------------------------------------------------------------------------------------------------------------------------------------------------------------------------------------------------------------------------------------------------------|
| <b>Methods</b>      | <p>Design: RCT</p> <p>Selection: all urban and rural general practitioners in the central and eastern Waikato region of New Zealand were invited to participate; all patients aged 40-79 years who attended the participating practices during a five day period received a screening form, based on currently recommended levels of physical activity, to establish eligibility.</p> <p>Exclusion criteria: patients considered by practice personnel considered as too unwell to participate; patients with debilitating medical condition or unstable cardiac condition; patients who did not understand English, or if they were expecting to leave the region</p>                                                                                                                                                                   |
| <b>Participants</b> | <p>Sample n= 878</p> <p>Intervention group n = 451; Control group n = 427</p> <p>Age: Mean age Intervention (SD): 57.2 (10.8); Mean age Control (SD): 58.6 (11.5)</p> <p>Gender [Female n(%): Intervention n = 301 (67%); Control n = 281 (66%)</p> <p>Race/Ethnicity: Intervention: NR</p> <p>SES [lower SES]: Intervention: n = 205 (45%); Control: n = 211 (49%)</p> <p>Loss to follow-up: Intervention n = 68; Control n = 64</p>                                                                                                                                                                                                                                                                                                                                                                                                    |
| <b>Intervention</b> | <p>Intervention: goals for increasing physical activity discussed and set with primary care professional, written on a green prescription and given to patient as well as faxed to local sports foundation; exercise specialists make at least three calls (10-20 minutes each) to patients over three months to encourage and support them using motivational interviewing techniques and give specific advice about exercise or community groups; quarterly newsletters from sports foundation about exercise initiatives in the community and motivational material; other materials sent to interested participants; general practice staff encouraged to provide feedback to participants on subsequent visits</p> <p>Control: usual care</p> <p>Duration of intervention: 12 months</p> <p>Length of follow-up: immediate post</p> |

|                       |                                                                                                                                                                                                                                                                                                                                                |
|-----------------------|------------------------------------------------------------------------------------------------------------------------------------------------------------------------------------------------------------------------------------------------------------------------------------------------------------------------------------------------|
| <b>Study/Location</b> | <p>Eriksson 2009<sup>7</sup> Sweden<br/> <i>Companion paper</i>: Eriksson<sup>36</sup></p>                                                                                                                                                                                                                                                     |
| <b>Objective</b>      | <p>To test whether intensive lifestyle modification, shown previously in tightly-controlled clinical trials to be efficacious for diabetes risk-reduction among high-risk individuals, can reduce cardiovascular risk factor levels in the primary care setting</p>                                                                            |
| <b>Methods</b>        | <p>Design: RCT</p> <p>Selection: selected from the catchment area of a primary health care center in the town of Boden in northern Sweden; invited by letter</p> <p>Inclusion criteria: individuals from the clinic aged 18–65 years with a clinically documented diagnosis of hypertension, dyslipidemia, type 2 diabetes, and/or obesity</p> |

|                     |                                                                                                                                                                                                                                                                                                                                                                                                                        |
|---------------------|------------------------------------------------------------------------------------------------------------------------------------------------------------------------------------------------------------------------------------------------------------------------------------------------------------------------------------------------------------------------------------------------------------------------|
|                     | Exclusion criteria: diagnosis of coronary heart disease, stroke, transient ischemic attack, severe hypertension (SBP>180 or DBP>105 mmHg), dementia or severe psychiatric morbidity                                                                                                                                                                                                                                    |
| <b>Participants</b> | <p>Sample: n = 151</p> <p>Intervention group n = 71; Control group n = 74</p> <p>Age: Mean age Intervention (SD): 57.7 (6.6); Mean age Control (SD): 53.1 (8.2)</p> <p>Gender [Female n(%): Intervention:36 (51%), Control: 47 (63.5%)</p> <p>Loss to follow-up: Intervention n = 13; Control n = 12</p>                                                                                                               |
| <b>Intervention</b> | <p>Intervention: supervised exercise training and diet counseling, followed by regular group meetings</p> <p>Control: standard care group given verbal and written information about healthy behaviours, including exercise and diet by the physician, a physiotherapist and a dietician at a group meeting following baseline exam</p> <p>Duration of intervention: 3 months</p> <p>Length of follow-up: 9 months</p> |

|                       |                                                                                                                                                                                                                                                                                                                                                                                                                                                                                  |
|-----------------------|----------------------------------------------------------------------------------------------------------------------------------------------------------------------------------------------------------------------------------------------------------------------------------------------------------------------------------------------------------------------------------------------------------------------------------------------------------------------------------|
| <b>Study/Location</b> | Forster 1988 <sup>8</sup> US                                                                                                                                                                                                                                                                                                                                                                                                                                                     |
| <b>Objective</b>      | The objective of this study was to evaluate the feasibility and effectiveness of a program for weight gain prevention in normal-weight adults                                                                                                                                                                                                                                                                                                                                    |
| <b>Methods</b>        | <p>Design: RCT</p> <p>Selection: recruited from a list of individuals screened for cardiovascular risk factors as part of the Minnesota Heart Health Program; individuals of normal weight at the time of their visit (before Jan 1986) were sent a letter in Feb 1986 describing the program and requesting that they return a prepaid postcard if they wanted further information</p> <p>Inclusion criteria: there was no lower weight limit for eligibility for the study</p> |
| <b>Participants</b>   | <p>Sample: 219</p> <p>Intervention n= NR ;Control n= NR</p> <p>Age: Mean age Overall (SD): 45.9</p> <p>Gender [Female n(%): 71.0% overall</p> <p>Loss to follow-up: NR</p>                                                                                                                                                                                                                                                                                                       |
| <b>Intervention</b>   | <p>Intervention: monthly newsletter for 1 year including information relevant to weight control; financial incentive for weight maintenance; offered an optional educational course of four sessions offered midway through the year</p> <p>Control: not contacted between the baseline visit and a follow-up scheduled 1 year later</p> <p>Duration of intervention: 12 months</p>                                                                                              |

|  |                                     |
|--|-------------------------------------|
|  | Length of follow-up: immediate post |
|--|-------------------------------------|

|                       |                                                                                                                                                                                                                                                                                                                                                                                                                                                                                                                                                                                                                                                                                                                                                                                                                                              |
|-----------------------|----------------------------------------------------------------------------------------------------------------------------------------------------------------------------------------------------------------------------------------------------------------------------------------------------------------------------------------------------------------------------------------------------------------------------------------------------------------------------------------------------------------------------------------------------------------------------------------------------------------------------------------------------------------------------------------------------------------------------------------------------------------------------------------------------------------------------------------------|
| <b>Study/Location</b> | Friedenreich 2011 <sup>9</sup> Canada<br><i>Companion papers: Friedenreich</i> <sup>37-39</sup>                                                                                                                                                                                                                                                                                                                                                                                                                                                                                                                                                                                                                                                                                                                                              |
| <b>Objective</b>      | To examine the effects of an aerobic exercise intervention on adiposity outcomes that may be involved in the association between physical activity and breast cancer risk                                                                                                                                                                                                                                                                                                                                                                                                                                                                                                                                                                                                                                                                    |
| <b>Methods</b>        | Design: RCT<br><br>Selection: women recruited through targeted mailings to participants in the Alberta Breast Screening Program, posters and brochures distributed to family physicians and media campaigns between May 2003 and June 2006<br><br>Inclusion criteria: age 50-74 years; postmenopausal; no previous cancer diagnosis; no major comorbidities; acceptable baseline fitness test; sedentary (<90 min of weekly exercise or, if between 90 and 120 min, having a VO <sub>2</sub> max level <34 kg-1min-1); able to do unrestricted physical activity; normal blood lipid and hormone levels, BMI between 22 and 40 kg/m <sup>2</sup> ; nonsmoker; <14 drinks per week of alcohol; no medications or exogenous hormones that might influence estrogen metabolism and not currently or planning to undertake a weight loss program |
| <b>Participants</b>   | Sample: 320<br><br>Intervention n=160 ; Control n=160<br><br>Age: Mean age Intervention (SD): 61.2 (5.4); Mean age Control: 60.6 (5.7)<br><br>Gender [Female n(%)]: 100%<br><br>SES: educated beyond high school<br><br>Intervention: 112 (70%); Control: 102 (64%)<br><br>Loss to follow-up: Overall n=9; Intervention n=5; Control n=4                                                                                                                                                                                                                                                                                                                                                                                                                                                                                                     |
| <b>Intervention</b>   | Intervention: exercise prescription was moderate-to-vigorous intensity aerobic exercise for at least 45 min on 5 days per week for 1 year; at least three sessions per week were facility based with on-site exercise trainers and remaining sessions were home based; prescription ramped up over the first 3 months starting with three weekly sessions of 15-20 min at 50-60% of the heart rate reserve; program individualized to the age and fitness level of each participant; women were instructed not to change their usual diet<br><br>Control: asked to maintain their regular lifestyle<br><br>Duration of intervention: 12 months<br><br>Length of follow-up: immediate post                                                                                                                                                    |

|                       |                                                                                                                          |
|-----------------------|--------------------------------------------------------------------------------------------------------------------------|
| <b>Study/Location</b> | Harris 2012 <sup>10</sup> Australia                                                                                      |
| <b>Objective</b>      | To evaluate the impact of a lifestyle intervention in Australian general practice to reduce the risk of vascular disease |

|                     |                                                                                                                                                                                                                                                                                                                                                                                                                                                                                                                                                                                                                                                                                                                                                                                                                                         |
|---------------------|-----------------------------------------------------------------------------------------------------------------------------------------------------------------------------------------------------------------------------------------------------------------------------------------------------------------------------------------------------------------------------------------------------------------------------------------------------------------------------------------------------------------------------------------------------------------------------------------------------------------------------------------------------------------------------------------------------------------------------------------------------------------------------------------------------------------------------------------|
| <b>Methods</b>      | <p>Design: RCT</p> <p>Selection: recruited from within 30 eligible practices</p> <p>Inclusion criteria: participants who had attended the practice in the previous 12 months and were either aged 40-55 years with a recorded diagnosis of hypertension and/or hyperlipidaemia or were aged 56-64 with or without recorded risk factors</p>                                                                                                                                                                                                                                                                                                                                                                                                                                                                                             |
| <b>Participants</b> | <p>Sample: n= 699</p> <p>Intervention group n = 384; Control group n = 315</p> <p>Ages: 40-55 years Intervention group: 96 (25.0%); Control: 78 (24.8%);</p> <p>Ages: 56-64 Intervention group: 288 (75.0%); Control: 237 (75.2%)</p> <p>Gender [Female n(%)]: Intervention: 232 (60.4); Control: 169 (53.7)</p> <p>Race/Ethnicity: Intervention: NR</p> <p>SES [post-secondary education]: Intervention: 18.8; Control: 30.2</p> <p>Loss to follow-up: Intervention n = 29; Control n = 15</p>                                                                                                                                                                                                                                                                                                                                         |
| <b>Intervention</b> | <p>Intervention: brief intervention, which included an initial visit with a dietician or exercise physiologist for an assessment and individual goal setting, followed by attendance at a group education program "CHANGE for HIPS" which comprised 4 1.5 hours sessions over the first 3 months and a further two follow-up sessions at 6 and 9 months focused on education, physical activity (20-30 minutes of walking or resistance exercise) and self-management strategies aimed at promoting positive dietary and physical activity changes and weight loss</p> <p>Control: patients attending practices allocated to control group received usual general practice care for their risk factors, including routine pharmacological management</p> <p>Duration of intervention: 9 months</p> <p>Length of follow-up: 3 months</p> |

|                       |                                                                                                                                                                                                                                                                                                                                                                                                                                                                                                                                                                                                                                |
|-----------------------|--------------------------------------------------------------------------------------------------------------------------------------------------------------------------------------------------------------------------------------------------------------------------------------------------------------------------------------------------------------------------------------------------------------------------------------------------------------------------------------------------------------------------------------------------------------------------------------------------------------------------------|
| <b>Study/Location</b> | Hivert 2007 <sup>11</sup> Canada                                                                                                                                                                                                                                                                                                                                                                                                                                                                                                                                                                                               |
| <b>Objective</b>      | To explore the efficacy of a seminar based educational and behavioural program aimed at improving lifestyle in newly admitted undergraduate students                                                                                                                                                                                                                                                                                                                                                                                                                                                                           |
| <b>Methods</b>        | <p>Design: RCT</p> <p>Selection: recruitment by written advertisements, notices in lecture rooms and information tables in corridors of the university among two incoming student cohorts</p> <p>Inclusion criteria: full-time first or second year students at Faculte de Medecine et des Sciences de la santé de l'Universite de Sherbrooke (FMSSUS); having left parental home for &lt;2 years; BMI between 18-30 kg/m<sup>2</sup></p> <p>Exclusion criteria: any medical condition; regular use of any medication except oral contraceptives; being pregnant or planning a pregnancy during the two years of the study</p> |

|                     |                                                                                                                                                                                                                                                                                                                                                                                     |
|---------------------|-------------------------------------------------------------------------------------------------------------------------------------------------------------------------------------------------------------------------------------------------------------------------------------------------------------------------------------------------------------------------------------|
| <b>Participants</b> | <p>Sample: 115</p> <p>Intervention n=58 ;Control n=57</p> <p>Age: Mean age Intervention (SD): 19.9 (0.2); Mean age Control (SD): 19.5 (0.2)</p> <p>Gender [Female n(%)]: Intervention n=47 (81.0%); Control n=47 (82.4%)</p> <p>Loss to follow-up: Overall 19; Intervention 10; Control 9</p>                                                                                       |
| <b>Intervention</b> | <p>Intervention: small group interactive educational/behavioural seminars of approximately 45 minutes offered every 2 weeks for the first 2 months of the academic calendar and every month thereafter for the remaining 2 years (23 seminars in 2 years)</p> <p>Control: no intervention</p> <p>Duration of intervention: 24 months</p> <p>Length of follow-up: immediate post</p> |

|                       |                                                                                                                                                                                                                                                                                                                                                                                                                                                                                                                                                                                                                                                                                                                                                                                                                                                                                              |
|-----------------------|----------------------------------------------------------------------------------------------------------------------------------------------------------------------------------------------------------------------------------------------------------------------------------------------------------------------------------------------------------------------------------------------------------------------------------------------------------------------------------------------------------------------------------------------------------------------------------------------------------------------------------------------------------------------------------------------------------------------------------------------------------------------------------------------------------------------------------------------------------------------------------------------|
| <b>Study/Location</b> | <p>Imayama 2011<sup>12</sup> US</p> <p><i>Companion paper: McTiernan<sup>40</sup></i></p>                                                                                                                                                                                                                                                                                                                                                                                                                                                                                                                                                                                                                                                                                                                                                                                                    |
| <b>Objective</b>      | <p>The purpose of this study was to assess, in a randomized, controlled clinical trial, the effect of a 12-month moderate-to-vigorous intensity exercise program on weight, anthropometrics, and body composition and abdominal fat in women and men</p>                                                                                                                                                                                                                                                                                                                                                                                                                                                                                                                                                                                                                                     |
| <b>Methods</b>        | <p>Design: RCT</p> <p>Selection: recruited to a trial that examined the effects of exercise on colon cancer biomarkers [not to a trial specifically focused on obesity prevention]; recruited between 2001 and 2004 through gastroenterology practices, media placements, flyers, a study website and referrals</p> <p>Inclusion criteria: 40 to 75 years old; colonoscopy within the previous 3 years; engaged in &lt; 90 minutes/ week of moderate-to-vigorous intensity exercise during the previous 3 months [or low-fitness on VO2max testing]; &lt;two servings of alcohol/day; no history of invasive cancer or high risk for colon cancer (e.g.,familial polyposis, ulcerative colitis) or other serious medical conditions; normal response to a maximal exercise tolerance test; normal complete blood count and blood chemistries; and no contraindications for colon biopsy.</p> |
| <b>Participants</b>   | <p>Sample: 202</p> <p>Intervention n=100 ;Control n=102</p> <p>Age: Mean age Intervention (SD): women 54.4 (7.1) range 43-73; men 56.2 (6.7) range 40-69; Mean age Control (SD): women 53.7 (5.6) range 42-65; men 56.6 (7.6) range 40-74</p> <p>Gender [Female n(%)]: Intervention n=49 (49.0%); Control n=51 (50.0%)</p> <p>SES [college degree]: Intervention n=61 (61.0%); Control n=62 (60.8%)</p> <p>Loss to follow-up: Intervention 6; Control 2</p>                                                                                                                                                                                                                                                                                                                                                                                                                                  |

|                     |                                                                                                                                                                                                                                                                                                                                                                                                                                                                                                                                                                                                                                                                                                                                                                                                                               |
|---------------------|-------------------------------------------------------------------------------------------------------------------------------------------------------------------------------------------------------------------------------------------------------------------------------------------------------------------------------------------------------------------------------------------------------------------------------------------------------------------------------------------------------------------------------------------------------------------------------------------------------------------------------------------------------------------------------------------------------------------------------------------------------------------------------------------------------------------------------|
| <b>Intervention</b> | <p>Intervention: goal of 60 minutes/day, 6 days/week of moderate-to vigorous intensity aerobic exercise performed at facilities and at home, with gradual increase over first 12 weeks; participants required to exercise 3 times/week at one of four facilities under supervision of exercise specialists, provided with Polar (Polar Electro Inc., Lake Success, NY) heart rate monitors and advised to exercise at 60%-85% of their maximal heart rate on their baseline VO<sub>2</sub>max test; participants also asked to exercise at home or at exercise facilities 3 days/week with same instructions for exercise duration and intensity</p> <p>Control: asked not to change their exercise or diet habits during the trial</p> <p>Duration of intervention: 12 months</p> <p>Length of follow-up: immediate post</p> |
|---------------------|-------------------------------------------------------------------------------------------------------------------------------------------------------------------------------------------------------------------------------------------------------------------------------------------------------------------------------------------------------------------------------------------------------------------------------------------------------------------------------------------------------------------------------------------------------------------------------------------------------------------------------------------------------------------------------------------------------------------------------------------------------------------------------------------------------------------------------|

|                       |                                                                                                                                                                                                                                                                                                                                                                                                                                                                                                                                                                                                                                                                                                                                                                                                                                                              |
|-----------------------|--------------------------------------------------------------------------------------------------------------------------------------------------------------------------------------------------------------------------------------------------------------------------------------------------------------------------------------------------------------------------------------------------------------------------------------------------------------------------------------------------------------------------------------------------------------------------------------------------------------------------------------------------------------------------------------------------------------------------------------------------------------------------------------------------------------------------------------------------------------|
| <b>Study/Location</b> | Kanaya 2012 <sup>13</sup> USA                                                                                                                                                                                                                                                                                                                                                                                                                                                                                                                                                                                                                                                                                                                                                                                                                                |
| <b>Objective</b>      | A community-based, translational lifestyle program to reduce diabetes risk in lower-socioeconomic status (SES) and ethnic minority adults.                                                                                                                                                                                                                                                                                                                                                                                                                                                                                                                                                                                                                                                                                                                   |
| <b>Methods</b>        | <p>Design: RCT</p> <p>Selection: recruitment began with community-based, educational outreach to identify individuals at risk for diabetes in 4 distinct low-income neighborhoods</p> <p>Inclusion criteria: capillary blood glucose value between 106 and 160 milligrams per deciliter who had a moderate to high diabetes risk appraisal score; aged 25 years or older</p> <p>Exclusion criteria: diabetes (physician diagnosis, use of insulin or other diabetes medications); diagnosis (&lt;6 months) of myocardial infarction, congestive heart failure, or stroke; heart procedure or heart surgery (&lt;6 months); implanted defibrillator; hip or knee replacement (&lt;3 months); insufficient cognitive functioning; pregnancy; not conversant in English or Spanish; plans to move out of area in 1 year; spouse or partner already enrolled</p> |
| <b>Participants</b>   | <p>Sample: n = 238</p> <p>Intervention group n = 119; control group n = 119</p> <p>Age: Mean age Intervention (SD): 58 (16); Mean age Control (SD): 55 (17)</p> <p>Gender [Female n(%): Intervention: 73%; Control: 74%</p> <p>Race/Ethnicity: African American 23%, Non-Hispanic White 22.5%, Hispanic 37%</p> <p>SES [education]: &lt;High school 23%, High school 15.5%</p> <p>Loss to follow-up: Intervention n = 14; Control n = 12</p>                                                                                                                                                                                                                                                                                                                                                                                                                 |
| <b>Intervention</b>   | <p>Intervention: a 6-month active intervention phase and a 6-month maintenance phase; trained health department counselors provided education and skills training to modify diet and physical activity through primarily telephone-based counseling (12 calls) with 2 in person sessions and 5 optional group workshops</p> <p>Control: wait list</p>                                                                                                                                                                                                                                                                                                                                                                                                                                                                                                        |

|  |                                                                     |
|--|---------------------------------------------------------------------|
|  | Duration of intervention: 6 months<br>Length of follow-up: 6 months |
|--|---------------------------------------------------------------------|

|                       |                                                                                                                                                                                                                                                                                                                                                                                                                                                                                                                                                                                                                                                                                                                                                                                                                                              |
|-----------------------|----------------------------------------------------------------------------------------------------------------------------------------------------------------------------------------------------------------------------------------------------------------------------------------------------------------------------------------------------------------------------------------------------------------------------------------------------------------------------------------------------------------------------------------------------------------------------------------------------------------------------------------------------------------------------------------------------------------------------------------------------------------------------------------------------------------------------------------------|
| <b>Study/Location</b> | Kastarinen 2002 <sup>14</sup> Finland                                                                                                                                                                                                                                                                                                                                                                                                                                                                                                                                                                                                                                                                                                                                                                                                        |
| <b>Objective</b>      | To assess whether lifestyle counseling is effective in non-pharmacological treatment of hypertension in primary health care                                                                                                                                                                                                                                                                                                                                                                                                                                                                                                                                                                                                                                                                                                                  |
| <b>Methods</b>        | <p>Design: RCT</p> <p>Selection: The Lifestyle Intervention against Hypertension in Eastern Finland (LIHEF) study was conducted in 10 municipal primary health care centres in eastern Finland, mainly in North Karelia; participants enrolled between Feb 1996 and June 1997</p> <p>Inclusion: Eligible subjects were men and women aged 25–74 years with SBP 140–179 mmHg and/or DBP 90–109 mmHg or on antihypertensive drug therapy.</p> <p>Exclusion criteria: secondary hypertension, mental or physical illness serious enough to potentially influence compliance with study procedures, alcoholism, type 1 diabetes, current or planned pregnancy, recent myocardial infarction or stroke</p>                                                                                                                                        |
| <b>Participants</b>   | <p>Sample n= 715</p> <p>Intervention group n = 360; Control group n = 355</p> <p>Age: Mean age Intervention (SD): 54.4 (10.1); Mean age Control (SD): 54.2 (9.9)</p> <p>Gender [Female n(%)]: Intervention: n = 187 (52%); Control: n = 192 (54%)</p> <p>Loss to follow-up: Intervention n = 58; Control n = 71</p>                                                                                                                                                                                                                                                                                                                                                                                                                                                                                                                          |
| <b>Intervention</b>   | <p>Intervention: the core of the actual intervention consisted of four visits by participants to local public health nurses during the first year of the follow-up (1, 3, 6 and 9 months after randomization), and of three visits during the second year (15, 18 and 21 months after the randomization); participants systematically instructed to change their health behaviour primarily on the basis of their individual situation; a 2-h group session concentrates mainly on advice targeting reduction of salt intake and overweight was organized for the intervention group in every health care centre at 6 and 18 months</p> <p>Control: instructed to visit their own physicians and public health nurses according to usual practices</p> <p>Duration of intervention: 24 months</p> <p>Length of follow-up: immediate post</p> |

|                       |                                                                                                                                                                                                                           |
|-----------------------|---------------------------------------------------------------------------------------------------------------------------------------------------------------------------------------------------------------------------|
| <b>Study/Location</b> | Khare 2012 <sup>15</sup> USA<br><i>Companion paper: Khare<sup>41</sup></i>                                                                                                                                                |
| <b>Objective</b>      | Aimed at reducing CVD risk factors among uninsured and underinsured women who are participants in the Illinois Breast and Cervical Cancer Program (IBCCP), an early detection and screening program for low-income women. |



|                     |                                                                                                                                                                                                                                                                                                                                                                                                                                                                                |
|---------------------|--------------------------------------------------------------------------------------------------------------------------------------------------------------------------------------------------------------------------------------------------------------------------------------------------------------------------------------------------------------------------------------------------------------------------------------------------------------------------------|
| <b>Methods</b>      | <p>Design: RCT</p> <p>Selection: recruited from Illinois Breast and Cervical Cancer Program (IBCCP) using family info sessions, personal phone calls, fliers and advertisements</p> <p>Inclusion: underinsured and uninsured women aged 40 to 64 years who were enrolled in the Illinois Breast and Cervical Cancer Program (IBCCP)</p>                                                                                                                                        |
| <b>Participants</b> | <p>Sample n= 833</p> <p>Intervention group n = 418; Control group n = 415</p> <p>Age: Mean age Overall (SD): 52.5 (7.0); Mean age Intervention (SD): 52.4 (7.0); Mean age Control (SD): 52.5 (6.9)</p> <p>Gender [Female n(%): 100%</p> <p>Race/Ethnicity: Intervention: Non-Hispanic White 84.1%; Control: Non-Hispanic White 84.2%</p> <p>SES [Education grades 9-12]: Intervention: 60%; Control: 58.9%</p> <p>Loss to follow-up: Intervention n = 193; Control n = 135</p> |
| <b>Intervention</b> | <p>Intervention: received CVD risk factor screening, CVD-related educational materials, referrals to physician care as needed, a 12-week lifestyle intervention, and follow-up contacts for 24 months from the baseline screening</p> <p>Control: received CVD risk factor screening and CVD-related educational materials</p> <p>Duration of intervention: 12 weeks</p> <p>Length of follow-up: 40 weeks</p>                                                                  |

|                       |                                                                                                                                                                                                                                                                                                                                                                                                                                                                                                                                                                                                                                                                                                                                                                                                                                                                              |
|-----------------------|------------------------------------------------------------------------------------------------------------------------------------------------------------------------------------------------------------------------------------------------------------------------------------------------------------------------------------------------------------------------------------------------------------------------------------------------------------------------------------------------------------------------------------------------------------------------------------------------------------------------------------------------------------------------------------------------------------------------------------------------------------------------------------------------------------------------------------------------------------------------------|
| <b>Study/Location</b> | Lawton 2008 <sup>16</sup> New Zealand                                                                                                                                                                                                                                                                                                                                                                                                                                                                                                                                                                                                                                                                                                                                                                                                                                        |
| <b>Objective</b>      | To assess the effectiveness of a primary care based program of exercise on prescription among relatively inactive women over a two year period                                                                                                                                                                                                                                                                                                                                                                                                                                                                                                                                                                                                                                                                                                                               |
| <b>Methods</b>        | <p>Design: RCT</p> <p>Selection: recruited from an existing cohort of 50-74 year old women recruited by invitation letter from their general practitioner to a previous observational study of postmenopausal women between 1999 and 2002 from 10 primary care practices in Wellington; the remainder of the participants were recruited from 13 primary care practices in 2004-5, including two Maori health clinics; general practitioners at participating practices were asked to identify women in the age group from their practice register, excluding patients deemed inappropriate for participation in a physical activity trial and then sent letters to those identified as suitable, inviting them to participate in a lifestyle study.</p> <p>Inclusion criteria: women between 40-74; physically inactive, as determined by a one question screening tool</p> |

|                     |                                                                                                                                                                                                                                                                                                                                                                                                                                                                                                                                                                                                                                                                                                  |
|---------------------|--------------------------------------------------------------------------------------------------------------------------------------------------------------------------------------------------------------------------------------------------------------------------------------------------------------------------------------------------------------------------------------------------------------------------------------------------------------------------------------------------------------------------------------------------------------------------------------------------------------------------------------------------------------------------------------------------|
|                     | Exclusion criteria: women with a medical condition that might be adversely affected by increasing their physical activity, as determined by the physical activity readiness questionnaire (PAR-Q) and subsequent assessment by their own general practitioner                                                                                                                                                                                                                                                                                                                                                                                                                                    |
| <b>Participants</b> | <p>Sample: 1089</p> <p>Intervention n=544 ; Control n=545</p> <p>Age: Mean age Intervention (SD): 59.1 (6.8) ; Mean age Control: 58.7 (6.9)</p> <p>Gender [Female n(%)]: 100%</p> <p>SES [lower socioeconomic status]: Intervention: 87 (16%), Control: 75 (14%)</p> <p>Loss to follow-up: 7% at 12 months and 11% at 24 months</p>                                                                                                                                                                                                                                                                                                                                                              |
| <b>Intervention</b> | <p>Intervention: primary care nurse briefly counsels (7-13 minutes) patients using motivational interviewing techniques to increase physical activity among those who are physically inactive (recommended goal was moderate intensity physical activity such as brisk walking, with a goal of achieving 30 minutes five days a week; follow-up was extended to include telephone calls over a nine month period (average of five calls, each lasting 15 minutes) with an added 30 minute visit with the primary care nurse at six months</p> <p>Control: usual care from primary care practice</p> <p>Duration of intervention: 9 months</p> <p>Length of follow-up: 3 months and 15 months</p> |

|                       |                                                                                                                                                                                                                                                                                                                                                                                                                                                                                                                                                                                                                                                                                                                                                                       |
|-----------------------|-----------------------------------------------------------------------------------------------------------------------------------------------------------------------------------------------------------------------------------------------------------------------------------------------------------------------------------------------------------------------------------------------------------------------------------------------------------------------------------------------------------------------------------------------------------------------------------------------------------------------------------------------------------------------------------------------------------------------------------------------------------------------|
| <b>Study/Location</b> | Levine 2007 <sup>17</sup> US                                                                                                                                                                                                                                                                                                                                                                                                                                                                                                                                                                                                                                                                                                                                          |
| <b>Objective</b>      | To evaluate the efficacy of two interventions relative to a control group in preventing weight gain among normal or overweight women and to identify demographic, behavioral, and psychosocial factors related to weight gain prevention                                                                                                                                                                                                                                                                                                                                                                                                                                                                                                                              |
| <b>Methods</b>        | <p>Design: RCT</p> <p>Selection: recruited through local television, radio, and newspaper advertisements, direct-market mailings, and announcements to employees of a local medical center</p> <p>Inclusion criteria: 25 and 44 years of age; good health according to a self-report questionnaire; BMI between 21 and 30</p> <p>Exclusion criteria: pregnant; had been pregnant or participated in a weight loss program in the past year; were receiving treatment for a psychiatric disorder; had taken a medication affecting body weight during the past 3 months; or were planning to relocate within the next 36 months. In addition, women who were unable to engage in moderate physical activity or make modest changes in dietary intake were excluded</p> |
| <b>Participants</b>   | <p>Sample: 284</p> <p>Intervention 1 (clinic) n=97; Intervention 2 (correspondence) n=94; Control n=93</p>                                                                                                                                                                                                                                                                                                                                                                                                                                                                                                                                                                                                                                                            |

|                     |                                                                                                                                                                                                                                                                                                                                                                                                                                                                                                                                                                                                                                                                                                                                                                                                                           |
|---------------------|---------------------------------------------------------------------------------------------------------------------------------------------------------------------------------------------------------------------------------------------------------------------------------------------------------------------------------------------------------------------------------------------------------------------------------------------------------------------------------------------------------------------------------------------------------------------------------------------------------------------------------------------------------------------------------------------------------------------------------------------------------------------------------------------------------------------------|
|                     | <p>Age: Mean age Intervention 1 (SD): 36.4 (5.7); Mean age Intervention 2 (SD): 35.0 (6.1); Mean age Control: 35.4 (5.3)</p> <p>Gender [Female n(%): 100%</p> <p>SES: % college graduate</p> <p>Intervention 1: 52.6%; Intervention 2: 74.5%; Control: 66.3%</p> <p>Loss to follow-up: Year 1: n= 62; Year 2: n=74; Year 3: n=79</p>                                                                                                                                                                                                                                                                                                                                                                                                                                                                                      |
| <b>Intervention</b> | <p>Intervention 1 (clinic-based): 15 group meetings over 24-month period. Sessions led by trained nutritionists and behavioral interventionists and held biweekly for first 2 months and bimonthly for next 22 months</p> <p>Intervention 2 (correspondence): 15 lessons by mail over 24-month period. The lessons were identical in content to the Clinic group and contained a brief homework assignment to be completed by the participant and returned by mail; participants asked to weigh themselves and report their weight on their returned assignment</p> <p>Control: received a booklet containing information about the benefits of weight maintenance, low-fat eating, and regular physical activity</p> <p>Duration of intervention: 24 months</p> <p>Length of follow-up: immediate post and 12 months</p> |

|                       |                                                                                                                                                                                                                                                                                                                                                                                                                                                                                                                                                                                                                                                                                                                                                                                      |
|-----------------------|--------------------------------------------------------------------------------------------------------------------------------------------------------------------------------------------------------------------------------------------------------------------------------------------------------------------------------------------------------------------------------------------------------------------------------------------------------------------------------------------------------------------------------------------------------------------------------------------------------------------------------------------------------------------------------------------------------------------------------------------------------------------------------------|
| <b>Study/Location</b> | Mensink 2003 <sup>18</sup> The Netherlands                                                                                                                                                                                                                                                                                                                                                                                                                                                                                                                                                                                                                                                                                                                                           |
| <b>Objective</b>      | To evaluate the impact of a 2-year combined diet and physical activity intervention program on glucose tolerance in Dutch subjects at increased risk for developing diabetes.                                                                                                                                                                                                                                                                                                                                                                                                                                                                                                                                                                                                        |
| <b>Methods</b>        | <p>Design: RCT</p> <p>Selection: patients selected from existing cohort</p> <p>Inclusion criteria: subjects with high risk of glucose intolerance, i.e., those of age &gt; 40 years and a family history of diabetes or a BMI <math>\geq 25</math> kg/m<sup>2</sup> selected from an existing cohort and invited to undergo a first oral glucose-tolerance test (OGTT)</p> <p>Exclusion criteria: overt or previously diagnosed diabetes (not gestational diabetes); medication use known to interfere with glucose tolerance; participation in regular vigorous exercise or an intensive weight reduction program during the previous year; presence of any (chronic) disease that hampered participation in a lifestyle intervention program; improbability of 5-year survival</p> |
| <b>Participants</b>   | <p>Sample: 114</p> <p>Intervention: n= 55; Control n = 59</p> <p>Age: Mean age Intervention (SD): 55.6 (0.9); Mean age Control (SD): 57.8 (1.0)</p> <p>Gender [Female n(%): 50 (44%)</p> <p>Loss to follow-up: Intervention n= 14; Control n= 11</p>                                                                                                                                                                                                                                                                                                                                                                                                                                                                                                                                 |

|                     |                                                                                                                                                                                                                                                                                                                                                                                                                                                                                               |
|---------------------|-----------------------------------------------------------------------------------------------------------------------------------------------------------------------------------------------------------------------------------------------------------------------------------------------------------------------------------------------------------------------------------------------------------------------------------------------------------------------------------------------|
| <b>Intervention</b> | <p>Intervention: consisted of a dietary and physical activity component, with visits scheduled at regular intervals throughout the study</p> <p>Control: received oral and written information about the beneficial effects of a healthy diet, weight loss, and increased physical activity; however, no individual advice or programs were provided and visits were only for the annual measurements</p> <p>Duration of intervention: 2 years</p> <p>Length of follow-up: immediate post</p> |
|---------------------|-----------------------------------------------------------------------------------------------------------------------------------------------------------------------------------------------------------------------------------------------------------------------------------------------------------------------------------------------------------------------------------------------------------------------------------------------------------------------------------------------|

|                       |                                                                                                                                                                                                                                                                                                                                                                                                                                                                                                                                                                                                                                                                                                                                                                                                                                                                                                                                                                                                                                          |
|-----------------------|------------------------------------------------------------------------------------------------------------------------------------------------------------------------------------------------------------------------------------------------------------------------------------------------------------------------------------------------------------------------------------------------------------------------------------------------------------------------------------------------------------------------------------------------------------------------------------------------------------------------------------------------------------------------------------------------------------------------------------------------------------------------------------------------------------------------------------------------------------------------------------------------------------------------------------------------------------------------------------------------------------------------------------------|
| <b>Study/Location</b> | Roderick 1997 <sup>19</sup> UK                                                                                                                                                                                                                                                                                                                                                                                                                                                                                                                                                                                                                                                                                                                                                                                                                                                                                                                                                                                                           |
| <b>Objective</b>      | To compare the effectiveness of structured dietary advice by practice nurses with standard health education in changing serum cholesterol, weight and diet.                                                                                                                                                                                                                                                                                                                                                                                                                                                                                                                                                                                                                                                                                                                                                                                                                                                                              |
| <b>Methods</b>        | <p>Design: RCT</p> <p>Selection: eight practices from the Medical Research Centre's (MRC's) general practice research framework (GPRF) were selected in pairs with one pair from each of four geographical areas - Yorkshire, Midlands, south-east England and South Wales</p> <p>Inclusion: ages 35-59 attending surgery who did not have contra-indications, i.e known causes of secondary hyperlipidaemia, sever psychiatric illness, pregnancy, terminal illness or those already attending a coronary heart disease health promotion clinic</p>                                                                                                                                                                                                                                                                                                                                                                                                                                                                                     |
| <b>Participants</b>   | <p>Sample n= 956</p> <p>Intervention group n = 473; Control group n = 483</p> <p>Age: Mean age Intervention (SD): 47.2 years; Mean age Control (SD): 47.4 years</p> <p>Gender [Female n(%)]: Intervention n = 246 (52%); Control n = 232(48%)</p> <p>Loss to follow-up: Intervention n = 66; Control n = 126</p>                                                                                                                                                                                                                                                                                                                                                                                                                                                                                                                                                                                                                                                                                                                         |
| <b>Intervention</b>   | <p>Intervention: standard health education from the leaflets Guides to Healthy Eating, Giving up smoking, Look After Your Heart, Heart Disease, and Exercise, Why Bother?; dietary advice, based on negotiated changes, which aimed for food substitution (i.e nurse and patient negotiated and agreed up to 5 changes) after review of the type, quantity and frequency of key foods consumed; specially designed dietary sheets were given out according to whether weight loss was required; all foods were classified as 'to eat plentifully', 'in moderation' or 'on special occasions only'; patients who were overweight (BMI over 25 kg/m<sup>2</sup>) were given special advice, including a self-monitoring chart and a choice of a calorie-restricted diet</p> <p>Control: standard health education from the leaflets Guides to Healthy Eating, Giving up smoking, Look After Your Heart, Heart Disease, and Exercise, Why Bother?</p> <p>Duration of intervention: 12 months</p> <p>Length of follow-up: immediate post</p> |

|                       |                                                                                                                                                                                                                                                                                                                                                                                                                                                                                                                                                                                                                                        |
|-----------------------|----------------------------------------------------------------------------------------------------------------------------------------------------------------------------------------------------------------------------------------------------------------------------------------------------------------------------------------------------------------------------------------------------------------------------------------------------------------------------------------------------------------------------------------------------------------------------------------------------------------------------------------|
| <b>Study/Location</b> | Sacerdote 2006 <sup>20</sup> Italy                                                                                                                                                                                                                                                                                                                                                                                                                                                                                                                                                                                                     |
| <b>Objective</b>      | To investigate the effectiveness of a non-structured 15-min educational intervention by general practitioners (GPs) on modifications of daily diet among healthy adults                                                                                                                                                                                                                                                                                                                                                                                                                                                                |
| <b>Methods</b>        | <p>Design: RCT</p> <p>Selection: GPs were selected through their professional organizations as those most motivated in the trial. All patients aged 18–65 years attending the wards of 33 selected GPs (in the cities of Torino and Asti, Italy)</p> <p>Inclusion: patients aged 18–65 years attending the wards of 33 selected GPs (in the cities of Torino and Asti, Italy) were eligible if they were not obese [body mass index, (BMI) , 30] or affected by chronic or severe diseases. Only patients who visited their GP for reasons unrelated to gastrointestinal problems, and without dietary restrictions, were enrolled</p> |
| <b>Participants</b>   | <p>Sample n= 3179</p> <p>Intervention group n = 1592; Control group n = 1587</p> <p>Age: Mean age Intervention (SD): 44.7 (12.6); Mean age Control (SD): 44.2 (12.1)</p> <p>Gender [Female n(%)]: Intervention: n = 797 (50.1%); Control: n = 794 (50.0%)</p> <p>Loss to follow-up: Intervention n = 104; Control n = 98</p>                                                                                                                                                                                                                                                                                                           |
| <b>Intervention</b>   | <p>Intervention: at first visit to the intervention group the GP administered a 15-min personalized nutritional intervention, based on a brochure about diet and health that summarized the Italian Guidelines for a Correct Nutrition 1998.</p> <p>Control: ‘sham’ intervention, i.e. a simpler and non-personalized conversation without the use of a brochure.</p> <p>Duration of intervention: 15 minutes</p> <p>Length of follow-up: 12 months</p>                                                                                                                                                                                |

|                       |                                                                                                                                                                                                                                                                                                                                                                                                                                                                                                       |
|-----------------------|-------------------------------------------------------------------------------------------------------------------------------------------------------------------------------------------------------------------------------------------------------------------------------------------------------------------------------------------------------------------------------------------------------------------------------------------------------------------------------------------------------|
| <b>Study/Location</b> | <p>Simkin-Silverman 1998<sup>21</sup> US</p> <p><i>Companion papers:</i> Simkin-Silverman,<sup>42</sup> Salamone,<sup>43</sup> Klem,<sup>44</sup> Kuller,<sup>45</sup> Park<sup>46</sup></p>                                                                                                                                                                                                                                                                                                          |
| <b>Objective</b>      | To report the 54-month results of a lifestyle dietary and physical activity program on weight, body composition, physical activity, diet, and other CVD risk factors.                                                                                                                                                                                                                                                                                                                                 |
| <b>Methods</b>        | <p>Design: RCT</p> <p>Selection: mailings targeted at registered voters in Allegheny, Pennsylvania</p> <p>Inclusion criteria: women ages 44-50 years; premenopausal by self-report; not taking hormone replacement therapy; BMI 20-34 kg/m<sup>2</sup>, fasting total cholesterol 140-260 mg/dl, fasting LDL-c 80-160 mg/dl, fasting glucose levels &lt; 140 mg/dl and diastolic blood pressure &lt; 95 mm Hg</p> <p>Exclusion criteria: Women taking lipid-lowering medication, antihypertensive</p> |

|                     |                                                                                                                                                                                                                                                                                                                                                                                                                                                                                                                                                                                                                                                                                                                                                                                                             |
|---------------------|-------------------------------------------------------------------------------------------------------------------------------------------------------------------------------------------------------------------------------------------------------------------------------------------------------------------------------------------------------------------------------------------------------------------------------------------------------------------------------------------------------------------------------------------------------------------------------------------------------------------------------------------------------------------------------------------------------------------------------------------------------------------------------------------------------------|
|                     | medication, insulin, thyroid medication, or psychotropic medications                                                                                                                                                                                                                                                                                                                                                                                                                                                                                                                                                                                                                                                                                                                                        |
| <b>Participants</b> | <p>Sample: 535</p> <p>Intervention n= 260; Control n= 275</p> <p>Age: Mean age Overall (SD): ages 44 to 50</p> <p>Gender [Female n(%)]: 100%</p> <p>Loss to follow-up: Overall ; Intervention n=14 ; Control n= 12</p>                                                                                                                                                                                                                                                                                                                                                                                                                                                                                                                                                                                      |
| <b>Intervention</b> | <p>Intervention: 5-year behavioral dietary and physical activity program conducted in 2 phases during the 5 years trial</p> <p>Phase 1 (weeks 1-20): 15 group meetings, presentation, handouts, homework assignments, low-fat/reduced-calorie meal plan, suggested increase in physical activity expenditure (activity prescription) for moderate-intensity aerobic activity and purposeful lifestyle activities, with ongoing consultation , monitoring and written feedback</p> <p>Phase 2 (months 6-54): additional behavioural skills, support, motivation, group meetings, refresher programs, mail and telephone follow-up, incentives and group competitions</p> <p>Control: assessment-only control group</p> <p>Duration of intervention: 54 months</p> <p>Length of follow-up: immediate post</p> |

|                       |                                                                                                                                                                                                                                                                                                                                                                                                                                                       |
|-----------------------|-------------------------------------------------------------------------------------------------------------------------------------------------------------------------------------------------------------------------------------------------------------------------------------------------------------------------------------------------------------------------------------------------------------------------------------------------------|
| <b>Study/Location</b> | Sone 2002 <sup>22</sup> Japan                                                                                                                                                                                                                                                                                                                                                                                                                         |
| <b>Objective</b>      | To determine whether long-term lifestyle intervention can improve glycemic control and prevent complications in patients with type 2 diabetes.                                                                                                                                                                                                                                                                                                        |
| <b>Methods</b>        | <p>Design: RCT</p> <p>Selection: patients previously diagnosed with type 2 diabetes with HbA1c levels &gt;6.5% from all over Japan were recruited from 59 institutes specializing in diabetes care</p>                                                                                                                                                                                                                                                |
| <b>Participants</b>   | <p>Sample: 2205</p> <p>Intervention n=1105 ;Control n=1100</p> <p>Age: Mean age Intervention (SD): 59.4 (7.5); Mean age Control (SD): 59.4 (7.4)</p> <p>Gender [Female n(%)]: Intervention n=495; Control n=505</p> <p>SES [college degree or higher]: Intervention: 240; Control: 238</p> <p>Unemployed: Intervention 681; Control 353</p> <p>Co-morbidities: Diabetes</p> <p>Loss to follow-up: Overall loss 232; Intervention 115; Control 117</p> |
| <b>Intervention</b>   | Intervention: lifestyle modification program with intensive lifestyle management at each outpatient visit and telephone counseling sessions by trained nurse educators at                                                                                                                                                                                                                                                                             |

|  |                                                                                                                                                                                |
|--|--------------------------------------------------------------------------------------------------------------------------------------------------------------------------------|
|  | <p>least once every 2 weeks</p> <p>Control: regular conventional care</p> <p>Duration of intervention: not specified</p> <p>Length of follow-up: 36 months post initiation</p> |
|--|--------------------------------------------------------------------------------------------------------------------------------------------------------------------------------|

|                       |                                                                                                                                                                                                                                                                                                                                                                                                                                                                                                                                                                                                                                                                                                                                                                                                                                     |
|-----------------------|-------------------------------------------------------------------------------------------------------------------------------------------------------------------------------------------------------------------------------------------------------------------------------------------------------------------------------------------------------------------------------------------------------------------------------------------------------------------------------------------------------------------------------------------------------------------------------------------------------------------------------------------------------------------------------------------------------------------------------------------------------------------------------------------------------------------------------------|
| <b>Study/Location</b> | Step toe 1999 <sup>23</sup> UK                                                                                                                                                                                                                                                                                                                                                                                                                                                                                                                                                                                                                                                                                                                                                                                                      |
| <b>Objective</b>      | To measure the effect of behaviourally oriented counseling in general practice on healthy behaviour and biological risk factors in patients at increased risk of coronary heart disease.                                                                                                                                                                                                                                                                                                                                                                                                                                                                                                                                                                                                                                            |
| <b>Methods</b>        | <p>Design: RCT</p> <p>Selection: 42 training practices linked with the Department of General Practice at St. George's Hospital Medical School and within the South Thames region were invited to participate by means of letters outlining the study aims</p> <p>Inclusion criteria: <math>\geq 1</math> modifiable cardiovascular risk factors: regular cigarette smoking (<math>&gt;1</math> cigarette/day), high serum cholesterol concentration (6.59.0 mmol/l), combined high BMI (2535) and low physical activity (<math>&lt;12</math> episodes of vigorous or moderate exercise for at least 20 minutes in the past 4 weeks)</p> <p>Exclusion criteria: active follow up or drugs for coronary heart disease, CVD or peripheral vascular disease, serious chronic illness, prescribed special diet, lipid lowering drugs</p> |
| <b>Participants</b>   | <p>Sample n= 883</p> <p>Intervention group n =316; Control group n = 567</p> <p>Age: Mean age Overall (SD): 46.7 (0.4 SE)</p> <p>Gender [Female n(%)]: n=477 (54.0%)</p> <p>Loss to follow-up: Overall n = 365; Intervention n = 148; Control n = 217</p>                                                                                                                                                                                                                                                                                                                                                                                                                                                                                                                                                                           |
| <b>Intervention</b>   | <p>Intervention: invited for three counseling sessions if they had two risk factors and for two counseling sessions if only one risk factor; counseling sessions scheduled to last <math>\leq 20</math> minutes, and between sessions the nurse contacted the patient by telephone one or two times to consolidate the counselling and to encourage behaviour change</p> <p>Control: usual care</p> <p>Duration of intervention: 12 months</p> <p>Length of follow-up: immediate post</p>                                                                                                                                                                                                                                                                                                                                           |

|                       |                                                                                                                                                                   |
|-----------------------|-------------------------------------------------------------------------------------------------------------------------------------------------------------------|
| <b>Study/Location</b> | Velthuis 2009 <sup>24</sup> The Netherlands<br><i>Companion paper: Monnikhof</i> <sup>47</sup>                                                                    |
| <b>Objective</b>      | To investigate the effect of a 12-month moderate-to-vigorous exercise program combining aerobic and muscle strength training on body composition among sedentary, |

|                     |                                                                                                                                                                                                                                                                                                                                                                                                                                                                                                                                                                                                                                                                                                                                                                                                                                                                                                                                                                                            |
|---------------------|--------------------------------------------------------------------------------------------------------------------------------------------------------------------------------------------------------------------------------------------------------------------------------------------------------------------------------------------------------------------------------------------------------------------------------------------------------------------------------------------------------------------------------------------------------------------------------------------------------------------------------------------------------------------------------------------------------------------------------------------------------------------------------------------------------------------------------------------------------------------------------------------------------------------------------------------------------------------------------------------|
|                     | postmenopausal women                                                                                                                                                                                                                                                                                                                                                                                                                                                                                                                                                                                                                                                                                                                                                                                                                                                                                                                                                                       |
| <b>Methods</b>      | <p>Design: RCT</p> <p>Selection: random selection out of municipality registries in Utrecht and surroundings in the Netherlands</p> <p>Inclusion criteria: post-menopausal women; 50-69 years old; sedentary (&lt;2 hours/week in moderate sport recreational activities and not adherent to the International Physical Activity Recommendation); non-smokers for <math>\geq 12</math> months; not abusing alcohol or drugs; not planning a strict diet; not experiencing diabetes mellitus or other endocrine related diseases or any disease/disorder (locomotor, optical, neurological, mental) that might impede participation in exercise program; BMI 22-40 kg/m<sup>2</sup>; fluent in Dutch language; had last menses <math>\geq 12</math> months ago; not used hormone replacement or oral contraceptives in the past 6 months; not diagnosed with breast cancer; not diagnosed with other cancers in the past 5 years; not currently using cortico steroids or beta-blockers</p> |
| <b>Participants</b> | <p>Sample: 189</p> <p>Intervention n=96 ; Control n=93</p> <p>Age: Mean age Intervention (SD): 58.9 (4.6); Mean age Control: 58.4 (4.2)</p> <p>Gender [Female n(%)]: 100%</p> <p>Loss to follow-up: Overall n=6; Intervention n=1; Control n=5</p>                                                                                                                                                                                                                                                                                                                                                                                                                                                                                                                                                                                                                                                                                                                                         |
| <b>Intervention</b> | <p>Intervention: one-year moderate to vigorous exercise program, which included 2 supervised group sessions of 1 hour/week and an additional home-based individual session of 30 min/week</p> <p>Control: requested to retain habitual exercise patterns</p> <p>Duration of intervention: 12 months</p> <p>Length of follow-up: immediate post</p>                                                                                                                                                                                                                                                                                                                                                                                                                                                                                                                                                                                                                                         |

|                       |                                                                                                                                                                                                                                                                                                                  |
|-----------------------|------------------------------------------------------------------------------------------------------------------------------------------------------------------------------------------------------------------------------------------------------------------------------------------------------------------|
| <b>Study/Location</b> | Vermunt 2012 <sup>25</sup> The Netherlands<br><i>Companion paper: Vermunt<sup>48</sup></i>                                                                                                                                                                                                                       |
| <b>Objective</b>      | To determine the effectiveness of a 2.5-year lifestyle intervention for Type 2 diabetes prevention in Dutch general practice compared with usual care                                                                                                                                                            |
| <b>Methods</b>        | <p>Design: RCT</p> <p>Selection: recruited by 48 general practitioners from 14 general practices in Eindhoven and surroundings</p> <p>Inclusion criteria: Age between <math>\geq 40</math> and <math>\leq 70</math> and a score of <math>\geq 13</math> point on a Dutch translation of the Finnish FINDRISC</p> |
| <b>Participants</b>   | <p>Sample: n= 1065</p> <p>Intervention n = 479 and Control n = 446</p>                                                                                                                                                                                                                                           |



|                     |                                                                                                                                                                                                                                                                                                                                                                                                                                                                                                                      |
|---------------------|----------------------------------------------------------------------------------------------------------------------------------------------------------------------------------------------------------------------------------------------------------------------------------------------------------------------------------------------------------------------------------------------------------------------------------------------------------------------------------------------------------------------|
|                     | Age: Range $\geq 40$ years and $\leq 70$ years<br>Loss to follow-up: Intervention n = 70; Control n = 59                                                                                                                                                                                                                                                                                                                                                                                                             |
| <b>Intervention</b> | Intervention: 11 consultations of 20 min were scheduled over 2.5 years alternately with the nurse practitioner and the general practitioner; five group meetings were organized by to provide more detailed information on diet and exercise; also included a 1-h consultation with a dietician, in which a 3-day food record was discussed<br><br>Control: oral and written information on T2M and healthy lifestyle provided<br><br>Duration of intervention: 2.5 years<br><br>Length of follow-up: immediate post |

|                       |                                                                                                                                                                                                                                                                                                                                                                                                                                                                                                            |
|-----------------------|------------------------------------------------------------------------------------------------------------------------------------------------------------------------------------------------------------------------------------------------------------------------------------------------------------------------------------------------------------------------------------------------------------------------------------------------------------------------------------------------------------|
| <b>Study/Location</b> | Werkman 2010 <sup>26</sup> The Netherlands                                                                                                                                                                                                                                                                                                                                                                                                                                                                 |
| <b>Objective</b>      | To investigate the effect of a one year low-intensity computer-tailored energy balance program among recent retirees on waist circumference, body weight and body composition, blood pressure, physical activity and dietary intake                                                                                                                                                                                                                                                                        |
| <b>Methods</b>        | Design: RCT<br><br>Selection: recruited from pre-retirement workshops as offered by employers to approximately 10% of the Dutch retiring population; approximately 1,100 workshop attendees were invited to participate in the WAAG-Study from September 2003 to mid March 2004<br><br>Inclusion criteria: recent retirees (date of retirement $\leq 6$ months before or after baseline); 55-65 years; not undergoing medical treatments that might affect body composition.                               |
| <b>Participants</b>   | Sample: 415<br>Intervention n=174 ;Control n=178<br><br>Characteristics:<br>Age: Mean age Intervention (SD): 59.5 (2.5); Mean age Control 59.4 (2.3)<br>Gender [Female n(%)]: 0%<br>SES [% low education level]: Intervention: 25%; Control: 23%<br>Loss to follow-up: Intervention n=27; Control n=24                                                                                                                                                                                                     |
| <b>Intervention</b>   | Intervention: five program modules during the one year intervention period; newsletters every 2-3 months that contained study information, information about diet and physical activity and encouragements to use the modules<br><br>Control: provided with newsletters with general information about the study, such as study progress, and information about art exhibitions and city trips; they could not login to the website and had access to the general information about the study design only. |

|  |                                                   |
|--|---------------------------------------------------|
|  | Duration of intervention: 12 months               |
|  | Length of follow-up: immediate post and 12 months |

|                       |                                                                                                                                                                                                                                                                                                                                                                                                                                                                                                                                                                                                                                                    |
|-----------------------|----------------------------------------------------------------------------------------------------------------------------------------------------------------------------------------------------------------------------------------------------------------------------------------------------------------------------------------------------------------------------------------------------------------------------------------------------------------------------------------------------------------------------------------------------------------------------------------------------------------------------------------------------|
| <b>Study/Location</b> | Wister 2007 <sup>27</sup> Canada                                                                                                                                                                                                                                                                                                                                                                                                                                                                                                                                                                                                                   |
| <b>Objective</b>      | The objective of this study was to test the efficacy of a low intensity lifestyle intervention aimed at reducing the risk of cardiovascular disease among mid-life individuals                                                                                                                                                                                                                                                                                                                                                                                                                                                                     |
| <b>Methods</b>        | Design: RCT<br>Selection: population based recruitment 2002-2004 via ads in local newspapers, interviews on radio, posters for workplaces<br>Inclusion criteria: The 3 eligibility criteria were age 45–64 years, residence in the Fraser Health region and cardiovascular risk profile according to the literature for primary and secondary prevention                                                                                                                                                                                                                                                                                           |
| <b>Participants</b>   | Sample: 611<br>Intervention 1 (Primary Prevention group) n= 157; Control 1 (Primary Prevention group) n= 158; Intervention 2 (Secondary Prevention group) n= 153; Control 2 (Secondary Prevention group) n= 143<br>Age: Mean age Intervention 1 (SD): 55.8 (5.5); Mean age Control 1 (SD): 55.1 (5.2); Mean age Intervention 2 (SD): 56.6 (5.1) ; Mean age Control 2 (SD): 57.2 (5.0)<br>Gender [Female n(%)]: Intervention 1: n= 86 (54.8%); Control 1: n= 98 (62.0%); Intervention 2: n= 52 (34.0%); Control 2: n= 40 (28.0%)<br>Loss to follow-up: Overall n= 79 ; Intervention 1 n= 20; Control 1 n= 17; Intervention 2 n= 15; Control 2 n= 27 |
| <b>Intervention</b>   | Intervention: The intervention consisted of a report card (sent to the participant and his or her family doctor) showing the person's CVD risk profile, coupled with a Telehealth-guided self-care management system; Telehealth counseling occurred within 10 days of the patient receiving the annual report card and every 6 months thereafter for approximately 30 minutes per session, up to 60 minutes per year<br>Control: usual care<br>Duration of intervention: 12 months<br>Length of follow-up: immediate post                                                                                                                         |

## Reference List

- 1  
2  
3  
4  
5  
6  
7  
8 (1) Review Manager (RevMan) [Computer Program]. Version 5.1. 2011. Copenhagen, The Nordic  
9 Cochrane Centre, The Cochrane Collaboration. Available at:  
10 <http://ims.cochrane.org/revman/download>.
- 11  
12 (2) Babazono A, Kame C, Ishihara R, Yamamoto E, Hillman AL. Patient-motivated prevention of  
13 lifestyle-related disease in Japan: a randomized, controlled clinical trial. *Dis Manag Health Out.*  
14 2007;15(2):119-126. <http://dx.doi.org/10.2165/00115677-200715020-00007>.
- 15  
16 (3) Broekhuizen K, van Poppel MN, Koppes LL, Kindt I, Brug J, van Mechelen W. No significant  
17 improvement of cardiovascular disease risk indicators by a lifestyle intervention in people with  
18 familial hypercholesterolemia compared to usual care: results of a randomised controlled trial.  
19 *BMC Res Notes.* 2012;5:181. <http://dx.doi.org/10.1186/1756-0500-5-181>.
- 20  
21 (4) Burke V, Giangiulio N, Gillam HF, Beilin LJ, Houghton S. Physical activity and nutrition programs  
22 for couples: a randomized controlled trial. *J Clin Epidemiol.* 2003;56(5):421-432.  
23 [http://dx.doi.org/10.1016/S0895-4356\(02\)00610-8](http://dx.doi.org/10.1016/S0895-4356(02)00610-8).
- 24  
25 (5) Carty CL, Kooperberg C, Neuhauser ML et al. Low-fat dietary pattern and change in body-  
26 composition traits in the Women's Health Initiative Dietary Modification Trial. *Am J Clin Nutr.*  
27 2011;93(3):516-524. <http://dx.doi.org/10.3945/ajcn.110.006395>.
- 28  
29 (6) Elley CR, Kerse N, Arroll B, Robinson E. Effectiveness of counselling patients on physical activity  
30 in general practice: cluster randomised controlled trial. *BMJ.* 2003;326(7393):793.  
31 <http://dx.doi.org/10.1136/bmj.326.7393.793>.
- 32  
33 (7) Eriksson MK, Franks PW, Eliasson M. A 3-year randomized trial of lifestyle intervention for  
34 cardiovascular risk reduction in the primary care setting: the Swedish Bjorknas study. *PLoS One.*  
35 2009;4(4):e5195. <http://dx.doi.org/10.1371/journal.pone.0005195>.
- 36  
37 (8) Forster JL, Jeffery RW, Schmid TL, Kramer FM. Preventing weight gain in adults: a pound of  
38 prevention. *Health Psychol.* 1988;7(6):515-525. <http://dx.doi.org/10.1037/0278-6133.7.6.515>.
- 39  
40 (9) Friedenreich CM, Woolcott CG, McTiernan A et al. Adiposity changes after a 1-year aerobic  
41 exercise intervention among postmenopausal women: a randomized controlled trial. *Int J Obes.*  
42 2011;35(3):427-435. <http://dx.doi.org/10.1038/ijo.2010.147>.
- 43  
44 (10) Harris MF, Fanaian M, Jayasinghe UW et al. A cluster randomised controlled trial of vascular risk  
45 factor management in general practice. *Med J Aust.* 2012;197(7):387-393.  
46 <http://dx.doi.org/10.3310/hta1633010.5694/mja12.10313>.
- 47  
48 (11) Hivert MF, Langlois MF, Bérard P, Cuerrier JP, Carpentier AC. Prevention of weight gain in young  
49 adults through a seminar-based intervention program. *Int J Obes.* 2007;31(8):1262-1269.  
50 <http://dx.doi.org/10.1038/sj.ijo.0803572>.
- 51  
52  
53  
54  
55  
56  
57  
58  
59  
60

- 1  
2  
3  
4  
5  
6  
7  
8  
9  
10  
11  
12  
13  
14  
15  
16  
17  
18  
19  
20  
21  
22  
23  
24  
25  
26  
27  
28  
29  
30  
31  
32  
33  
34  
35  
36  
37  
38  
39  
40  
41  
42  
43  
44  
45  
46  
47  
48  
49  
50  
51  
52  
53  
54  
55  
56  
57  
58  
59  
60
- (12) Imayama I, Alfano CM, Cadmus Bertram LA et al. Effects of 12-month exercise on health-related quality of life: a randomized controlled trial. *Prev Med*. 2011;52(5):344-351. <http://dx.doi.org/10.1016/j.ypmed.2011.02.016>.
- (13) Kanaya AM, Santoyo-Olsson J, Gregorich S, Grossman M, Moore T, Stewart AL. The Live Well, Be Well study: a community-based, translational lifestyle program to lower diabetes risk factors in ethnic minority and lower-socioeconomic status adults. *Am J Public Health*. 2012;102(8):1551-1558. <http://dx.doi.org/10.2105/AJPH.2011.300456>.
- (14) Kastarinen MJ, Puska PM, Korhonen MH et al. Non-pharmacological treatment of hypertension in primary health care: a 2-year open randomized controlled trial of lifestyle intervention against hypertension in eastern Finland. *J Hypertens*. 2002;20(12):2505-2512. <http://dx.doi.org/10.1097/01.hjh.0000042893.24999.db>.
- (15) Khare MM, Carpenter RA, Huber R et al. Lifestyle intervention and cardiovascular risk reduction in the Illinois WISEWOMAN Program. *J Womens Health (Larchmt)*. 2012;21(3):294-301. <http://dx.doi.org/10.1089/jwh.2011.2926>.
- (16) Lawton BA, Rose SB, Elley CR, Dowell AC, Fenton A, Moyes SA. Exercise on prescription for women aged 40-74 recruited through primary care: two year randomised controlled trial. *BMJ*. 2008;337:a2509. <http://dx.doi.org/10.1136/bmj.a2509>.
- (17) Levine MD, Klem ML, Kalarchian MA et al. Weight gain prevention among women. *Obesity*. 2007;15(5):1267-1277. <http://dx.doi.org/10.1038/oby.2007.148>.
- (18) Mensink M, Blaak EE, Corpeleijn E, Saris WH, de Bruin TW, Feskens EJ. Lifestyle intervention according to general recommendations improves glucose tolerance. *Obes Res*. 2003;11(12):1588-1596. <http://dx.doi.org/10.1038/oby.2003.211>.
- (19) Roderick P, Ruddock V, Hunt P, Miller G. A randomized trial to evaluate the effectiveness of dietary advice by practice nurses in lowering diet-related coronary heart disease risk. *Br J Gen Pract*. 1997;47(414):7-12. Available at: <http://www.ncbi.nlm.nih.gov/pubmed/9115804?dopt=Citation>.
- (20) Sacerdote C, Fiorini L, Rosato R, Audenino M, Valpreda M, Vineis P. Randomized controlled trial: effect of nutritional counselling in general practice. *Int J Epidemiol*. 2006;35(2):409-415. <http://dx.doi.org/10.1093/ije/dyi170>.
- (21) Simkin-Silverman LR, Wing RR, Boraz MA, Kuller LH. Lifestyle intervention can prevent weight gain during menopause: results from a 5-year randomized clinical trial. *Ann Behav Med*. 2003;26(3):212-220. [http://dx.doi.org/10.1207/S15324796ABM2603\\_06](http://dx.doi.org/10.1207/S15324796ABM2603_06).
- (22) Sone H, Katagiri A, Ishibashi S et al. Effects of lifestyle modifications on patients with type 2 diabetes: the Japan Diabetes Complications Study (JDCS) study design, baseline analysis and three year-interim report. *Horm Metab Res*. 2002;34(9):509-515. <http://dx.doi.org/10.1055/s-2002-34791>.
- (23) Steptoe A, Doherty S, Rink E, Kerry S, Kendrick T, Hilton S. Behavioural counselling in general practice for the promotion of healthy behaviour among adults at increased risk of coronary

- 1  
2  
3 heart disease: randomised trial. *BMJ*. 1999;319(7215):943-947. doi:  
4 <http://dx.doi.org/10.1136/bmj.319.7215.943>.
- 5  
6  
7 (24) Velthuis MJ, Schuit AJ, Peeters PH, Monninkhof EM. Exercise program affects body composition  
8 but not weight in postmenopausal women. *Menopause (New York, NY)*. 2009;16(4):777-784.  
9 <http://dx.doi.org/10.1097/gme.0b013e318197122a>.
- 10  
11 (25) Vermunt PWA, Milder IEJ, Wielaard F et al. A lifestyle intervention to reduce Type 2 diabetes risk  
12 in Dutch primary care: 2.5-year results of a randomized controlled trial. *Diabet Med*.  
13 2012;29(8):e223-231. <http://dx.doi.org/10.1111/j.1464-5491.2012.03648.x>.
- 14  
15 (26) Werkman A, Hulshof PJ, Stafleu A et al. Effect of an individually tailored one-year energy balance  
16 programme on body weight, body composition and lifestyle in recent retirees: a cluster  
17 randomised controlled trial. *BMC Public Health*. 2010;10(1):110.  
18 <http://dx.doi.org/10.1186/1471-2458-10-110>.
- 19  
20 (27) Wister A, Loewen N, Kennedy-Symonds H, McGowan B, McCoy B, Singer J. One-year follow-up  
21 of a therapeutic lifestyle intervention targeting cardiovascular disease risk. *CMAJ*.  
22 2007;177(8):859-865. <http://dx.doi.org/10.1503/cmaj.061059>.
- 23  
24 (28) Dzator JA, Hendrie D, Burke V et al. A randomized trial of interactive group sessions achieved  
25 greater improvements in nutrition and physical activity at a tiny increase in cost. *J Clin*  
26 *Epidemiol*. 2004;57(6):610-619. <http://dx.doi.org/10.1016/j.jclinepi.2003.10.009>.
- 27  
28 (29) Burke V, Mori TA, Giangiulio N et al. An innovative program for changing health behaviours. *Asia*  
29 *Pac J Clin Nutr*. 2002;11(Suppl 3):S586-597. <http://dx.doi.org/10.1046/j.1440-6047.11.supp3.8.x>.
- 30  
31 (30) Burke V, Giangiulio N, Gillam HF, Beilin LJ, Houghton S, Milligan RAK. Health promotion in  
32 couples adapting to a shared lifestyle. *Health Educ Res*. 1999;14(2):269-288.
- 33  
34 (31) Howard BV, Curb JD, Eaton CB et al. Low-fat dietary pattern and lipoprotein risk factors: the  
35 Women's Health Initiative Dietary Modification Trial. *Am J Clin Nutr*. 2010;91(4):860-874.  
36 <http://dx.doi.org/10.3945/ajcn.2009.28034>.
- 37  
38 (32) Howard BV, Manson JE, Stefanick ML et al. Low-fat dietary pattern and weight change over 7  
39 years: the Women's Health Initiative Dietary Modification Trial. *JAMA*. 2006;295(1):39-49.  
40 <http://dx.doi.org/10.1001/jama.295.1.39>.
- 41  
42 (33) Tinker LF, Bonds DE, Margolis KL et al. Low-fat dietary pattern and risk of treated diabetes  
43 mellitus in postmenopausal women: the Women's Health Initiative randomized controlled  
44 dietary modification trial. *Arch Intern Med*. 2008;168(14):1500-1511.  
45 <http://dx.doi.org/10.1001/archinte.168.14.1500>.
- 46  
47 (34) Design of the Women's Health Initiative clinical trial and observational study. The Women's  
48 Health Initiative Study Group. *Control Clin Trials*. 1998;19(1):61-109. S0197245697000780 [pii].  
49 Available at: <http://www.ncbi.nlm.nih.gov/pubmed/9492970?dopt=Citation>.
- 50  
51  
52  
53  
54  
55  
56  
57  
58  
59  
60

- 1  
2  
3  
4  
5  
6  
7  
8  
9  
10  
11  
12  
13  
14  
15  
16  
17  
18  
19  
20  
21  
22  
23  
24  
25  
26  
27  
28  
29  
30  
31  
32  
33  
34  
35  
36  
37  
38  
39  
40  
41  
42  
43  
44  
45  
46  
47  
48  
49  
50  
51  
52  
53  
54  
55  
56  
57  
58  
59  
60
- (35) Hays J, Hunt JR, Hubbell FA et al. The Women's Health Initiative recruitment methods and results. *Ann Epidemiol*. 2003;13(9 Suppl):S18-77. [http://dx.doi.org/10.1016/S1047-2797\(03\)00042-5](http://dx.doi.org/10.1016/S1047-2797(03)00042-5).
- (36) Eriksson MK, Westborg CJ, Eliasson MC. A randomized trial of lifestyle intervention in primary healthcare for the modification of cardiovascular risk factors. *Scand J Public Health*. 2006;34(5):453-461. <http://dx.doi.org/10.1080/14034940500489826>.
- (37) Friedenreich CM, Neilson HK, Woolcott CG et al. Changes in insulin resistance indicators, IGFs, and adipokines in a year-long trial of aerobic exercise in postmenopausal women. *Endocr Relat Cancer*. 2011;18(3):357-369. <http://dx.doi.org/10.1530/ERC-10-0303>.
- (38) Friedenreich CM, Woolcott CG, McTiernan A et al. Alberta physical activity and breast cancer prevention trial: sex hormone changes in a year-long exercise intervention among postmenopausal women. *J Clin Oncol*. 2010;28(9):1458-1466. <http://dx.doi.org/10.1200/JCO.2009.24.9557>.
- (39) Friedenreich CM, Neilson HK, Woolcott CG et al. Mediators and moderators of the effects of a year-long exercise intervention on endogenous sex hormones in postmenopausal women. *Cancer Causes Control*. 2011;22(10):1365-1373. <http://dx.doi.org/10.1007/s10552-011-9809-5>.
- (40) McTiernan A, Sorensen B, Irwin ML et al. Exercise effect on weight and body fat in men and women. *Obesity*. 2007;15(6):1496-1512. <http://dx.doi.org/10.1038/oby.2007.178>.
- (41) Khare MM, Huber R, Carpenter RA et al. A lifestyle approach to reducing cardiovascular risk factors in underserved women: design and methods of the Illinois WISEWOMAN Program. *J Womens Health (Larchmt)*. 2009;18(3):409-419. <http://dx.doi.org/10.1089/jwh.2008.0911>.
- (42) Simkin-Silverman LR, Wing RR, Boraz MA, Meilahn EN, Kuller LH. Maintenance of cardiovascular risk factor changes among middle-aged women in a lifestyle intervention trial. *Womens Health*. 1998;4(3):255-271. Available at: <http://www.ncbi.nlm.nih.gov/pubmed/9787651?dopt=Citation>.
- (43) Salamone LM, Cauley JA, Black DM et al. Effect of a lifestyle intervention on bone mineral density in premenopausal women: a randomized trial. *Am J Clin Nutr*. 1999;70(1):97-103. Available at: <http://www.ncbi.nlm.nih.gov/pubmed/10393145?dopt=Citation>.
- (44) Klem ML, Wing RR, Simkin-Silverman L, Kuller LH. The psychological consequences of weight gain prevention in healthy, premenopausal women. *Int J Eating Disord*. 1997;21(2):167-174. [http://dx.doi.org/10.1002/\(SICI\)1098-108X\(199703\)21:2<167](http://dx.doi.org/10.1002/(SICI)1098-108X(199703)21:2<167).
- (45) Kuller LH, Simkin-Silverman LR, Wing RR, Meilahn EN, Ives DG. Women's Healthy Lifestyle Project: A randomized clinical trial: results at 54 months. *Circulation*. 2001;103(1):32-37. <http://dx.doi.org/10.1161/?01.CIR.103.1.32>.
- (46) Park HA, Lee JS, Kuller LH, Cauley JA. Effects of weight control during the menopausal transition on bone mineral density. *J Clin Endocrinol Metab*. 2007;92(10):3809-3815. <http://dx.doi.org/10.1210/jc.2007-1040>.

- 1  
2  
3 (47) Monninkhof EM, Peeters PH, Schuit AJ. Design of the sex hormones and physical exercise  
4 (SHAPE) study. *BMC Public Health*. 2007;7:232. <http://dx.doi.org/10.1186/1471-2458-7-232>.  
5  
6  
7 (48) Vermunt PW, Milder IE, Wielaard F, van Oers JA, Westert GP. An active strategy to identify  
8 individuals eligible for type 2 diabetes prevention by lifestyle intervention in Dutch primary care:  
9 the APHRODITE study. *Fam Pract*. 2010;27(3):312-319.  
10 <http://dx.doi.org/10.1093/fampra/cmp100>.  
11  
12  
13  
14  
15  
16  
17  
18  
19  
20  
21  
22  
23  
24  
25  
26  
27  
28  
29  
30  
31  
32  
33  
34  
35  
36  
37  
38  
39  
40  
41  
42  
43  
44  
45  
46  
47  
48  
49  
50  
51  
52  
53  
54  
55  
56  
57  
58  
59  
60

CONFIDENTIAL

**Table 3 - Search Strategy Medline-OVID**

Most Recent Search: June 27 2013

1. (suicide adj prevent\*).tw.
2. Weight Reduction Programs/
3. exp obesity/pc
4. Overweight/pc
5. weight maintenance.tw.
6. weight management.tw.
7. Diet, Reducing/
8. Diet, Fat-Restricted/
9. Caloric Restriction/
10. Diet Therapy/
11. (diet\* adj counsel\*).ti,ab.
12. (diet\* adj education\*).ti,ab.
13. (nutrition\* adj (counsel\* or education\* or intervention)).ti,ab.
14. (diet\$ adj (modi\*\$ or therapy or intervention\* or strateg\* or healthy)).ti,ab.
15. ((diet or dieting or slim\$) adj (club\$ or organi?ation\$)).ti,ab.
16. ((healthy living or healthy lifestyle) adj (program\* or intervention? or group or club or strategy)).tw.
17. (weightwatcher\* or weight watcher\* or commerical weightloss or commerical weight loss or Jenny Craig).tw.
18. exp \*Exercise/
19. Exercise Therapy/
20. Motor Activity/
21. Physical Fitness/
22. physical activity.ti,ab.
23. (exercise adj3 (program\* or intervention\* or strategy or club?)).ti,ab.
24. Fitness Centers/
25. health promotion/ or preventive health services/
26. Primary Prevention/
27. 25 or 26
28. exp \*obesity/
29. \*overweight/
30. \*Weight Gain/
31. 28 or 29 or 30
32. 27 and 31
33. 2 or 3 or 4 or 5 or 6
34. 7 or 8 or 9 or 10 or 11 or 12 or 13 or 14 or 15 or 16 or 17 or 18 or 19 or 20 or 21 or 22 or 23 or 24
35. 27 and 34
36. exp obesity/
37. overweight/
38. weight gain/
39. Weight Loss/
40. (weight or bmi or body mass index or waist circumference or obese or obesity).ti.
41. 36 or 37 or 38 or 39 or 40
42. 35 and 41
43. 32 or 33 or 42



- 1
- 2
- 3
- 4 44. animals/ not humans/
- 5 45. 43 not 44
- 6 46. limit 45 to "all child (0 to 18 years)"
- 7 47. limit 45 to "all adult (19 plus years)"
- 8 48. 46 not 47
- 9 49. 45 not 48
- 10 50. limit 49 to (english or french)
- 11 51. limit 50 to (case reports or comment or editorial or in vitro or letter or news or newspaper
- 12 article or webcasts)
- 13 52. 50 not 51
- 14 53. limit 52 to ed=20120426-20130527
- 15 54. meta-analysis/
- 16 55. exp meta-analysis as topic/
- 17 56. (meta analy\* or metaanaly\* or met analy\* or metanaly\*).tw.
- 18 57. review literature as topic/
- 19 58. (collaborative research or collaborative review\* or collaborative overview\*).tw.
- 20 59. (integrative research or integrative review\* or intergrative overview\*).tw.
- 21 60. (quantitative adj3 (research or review\* or overview\*)).tw.
- 22 61. (research integration or research overview\*).tw.
- 23 62. (systematic\* adj3 (review\* or overview\*)).tw.
- 24 63. (methodologic\* adj3 (review\* or overview\*)).tw.
- 25 64. exp technology assessment biomedical/
- 26 65. (hta or thas or technology assessment\*).tw.
- 27 66. ((hand adj2 search\*) or (manual\* adj search\*)).tw.
- 28 67. ((electronic adj database\*) or (bibliographic\* adj database\*)).tw.
- 29 68. ((data adj2 abstract\*) or (data adj2 extract\*)).tw.
- 30 69. (analys\* adj3 (pool or pooled or pooling)).tw.
- 31 70. mantel haenszel.tw.
- 32 71. (cohrane or pubmed or pub med or medline or embase or psycinfo or psychlit or psychinfo or
- 33 psychlit or cinahl or science citation index).ab.
- 34 72. or/54-71
- 35 73. limit 53 to "review"
- 36 74. 53 and 72
- 37 75. 73 not 74
- 38 76. 53 not 75
- 39 77. (weight or BMI or waist circumference or waist to hip ratio).mp.
- 40 78. Lifestyle.ti.
- 41 79. \*Life Style/
- 42 80. 78 or 79
- 43 81. 77 and 80
- 44 82. 27 and 81
- 45 83. (prevent or prevention or primary care).tw.
- 46 84. 81 and 83
- 47 85. 82 or 84
- 48 86. limit 85 to (english or french)
- 49
- 50
- 51
- 52
- 53
- 54
- 55
- 56
- 57
- 58
- 59
- 60

1  
2  
3  
4  
5  
6  
7  
8  
9  
10  
11  
12  
13  
14  
15  
16  
17  
18  
19  
20  
21  
22  
23  
24  
25  
26  
27  
28  
29  
30  
31  
32  
33  
34  
35  
36  
37  
38  
39  
40  
41  
42  
43  
44  
45  
46  
47  
48  
49  
50  
51  
52  
53  
54  
55  
56  
57  
58  
59  
60

- 87. limit 86 to (case reports or comment or editorial or in vitro or letter or news or newspaper article or webcasts)
- 88. 86 not 87
- 89. animals/ not humans/
- 90. 88 not 89
- 91. limit 90 to "all child (0 to 18 years)"
- 92. limit 90 to "all adult (19 plus years)"
- 93. 91 not 92
- 94. 90 not 93
- 95. limit 94 to "review"
- 96. 72 and 94
- 97. 95 not 96
- 98. 94 not 97
- 99. 98 not 76
- 100. limit 99 to yr="1980 -Current"
- 101. 76 or 100

CONFIDENTIAL

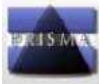

# PRISMA 2009 Checklist

1  
2  
3  
4  
5  
6  
7  
8  
9  
10  
11  
12  
13  
14  
15  
16  
17  
18  
19  
20  
21  
22  
23  
24  
25  
26  
27  
28  
29  
30  
31  
32  
33  
34  
35  
36  
37  
38  
39  
40  
41  
42  
43  
44  
45  
46  
47  
48  
49

| Section/topic                      | #  | Checklist item                                                                                                                                                                                                                                                                                              | Reported on page #         |
|------------------------------------|----|-------------------------------------------------------------------------------------------------------------------------------------------------------------------------------------------------------------------------------------------------------------------------------------------------------------|----------------------------|
| <b>TITLE</b>                       |    |                                                                                                                                                                                                                                                                                                             |                            |
| Title                              | 1  | Identify the report as a systematic review, meta-analysis, or both.                                                                                                                                                                                                                                         | title page (pg1)           |
| <b>ABSTRACT</b>                    |    |                                                                                                                                                                                                                                                                                                             |                            |
| Structured summary                 | 2  | Provide a structured summary including, as applicable: background; objectives; data sources; study eligibility criteria, participants, and interventions; study appraisal and synthesis methods; results; limitations; conclusions and implications of key findings; systematic review registration number. | Abstract (pg 2)            |
| <b>INTRODUCTION</b>                |    |                                                                                                                                                                                                                                                                                                             |                            |
| Rationale                          | 3  | Describe the rationale for the review in the context of what is already known.                                                                                                                                                                                                                              | 3-4                        |
| Objectives                         | 4  | Provide an explicit statement of questions being addressed with reference to participants, interventions, comparisons, outcomes, and study design (PICOS).                                                                                                                                                  | 4                          |
| <b>METHODS</b>                     |    |                                                                                                                                                                                                                                                                                                             |                            |
| Protocol and registration          | 5  | Indicate if a review protocol exists, if and where it can be accessed (e.g., Web address), and, if available, provide registration information including registration number.                                                                                                                               | 4                          |
| Eligibility criteria               | 6  | Specify study characteristics (e.g., PICOS, length of follow-up) and report characteristics (e.g., years considered, language, publication status) used as criteria for eligibility, giving rationale.                                                                                                      | 5-6                        |
| Information sources                | 7  | Describe all information sources (e.g., databases with dates of coverage, contact with study authors to identify additional studies) in the search and date last searched.                                                                                                                                  | 5                          |
| Search                             | 8  | Present full electronic search strategy for at least one database, including any limits used, such that it could be repeated.                                                                                                                                                                               | Table 3, Supplemental file |
| Study selection                    | 9  | State the process for selecting studies (i.e., screening, eligibility, included in systematic review, and, if applicable, included in the meta-analysis).                                                                                                                                                   | 5-6                        |
| Data collection process            | 10 | Describe method of data extraction from reports (e.g., piloted forms, independently, in duplicate) and any processes for obtaining and confirming data from investigators.                                                                                                                                  | 5                          |
| Data items                         | 11 | List and define all variables for which data were sought (e.g., PICOS, funding sources) and any assumptions and simplifications made.                                                                                                                                                                       | 5-6                        |
| Risk of bias in individual studies | 12 | Describe methods used for assessing risk of bias of individual studies (including specification of whether this was done at the study or outcome level), and how this information is to be used in any data synthesis.                                                                                      | 5                          |
| Summary measures                   | 13 | State the principal summary measures (e.g., risk ratio, difference in means).                                                                                                                                                                                                                               | 7-8                        |

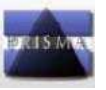

# PRISMA 2009 Checklist

1  
2  
3  
4  
5  
6  
7  
8  
9  
10  
11  
12  
13  
14  
15  
16  
17  
18  
19  
20  
21  
22  
23  
24  
25  
26  
27  
28  
29  
30  
31  
32  
33  
34  
35  
36  
37  
38  
39  
40  
41  
42  
43  
44  
45  
46  
47  
48  
49

|                      |    |                                                                                                                                                           |     |
|----------------------|----|-----------------------------------------------------------------------------------------------------------------------------------------------------------|-----|
| Synthesis of results | 14 | Describe the methods of handling data and combining results of studies, if done, including measures of consistency (e.g., $I^2$ ) for each meta-analysis. | 7-8 |
|----------------------|----|-----------------------------------------------------------------------------------------------------------------------------------------------------------|-----|

Page 1 of 2

| Section/topic               | #  | Checklist item                                                                                                                                   | Reported on page #                          |
|-----------------------------|----|--------------------------------------------------------------------------------------------------------------------------------------------------|---------------------------------------------|
| Risk of bias across studies | 15 | Specify any assessment of risk of bias that may affect the cumulative evidence (e.g., publication bias, selective reporting within studies).     | Included in every results subsection, 11-14 |
| Additional analyses         | 16 | Describe methods of additional analyses (e.g., sensitivity or subgroup analyses, meta-regression), if done, indicating which were pre-specified. | 7-8                                         |

## RESULTS

|                               |    |                                                                                                                                                                                                          |                                            |
|-------------------------------|----|----------------------------------------------------------------------------------------------------------------------------------------------------------------------------------------------------------|--------------------------------------------|
| Study selection               | 17 | Give numbers of studies screened, assessed for eligibility, and included in the review, with reasons for exclusions at each stage, ideally with a flow diagram.                                          | 8, also in Flow diagram, supplemental file |
| Study characteristics         | 18 | For each study, present characteristics for which data were extracted (e.g., study size, PICOS, follow-up period) and provide the citations.                                                             | Supplemental file                          |
| Risk of bias within studies   | 19 | Present data on risk of bias of each study and, if available, any outcome level assessment (see item 12).                                                                                                | Supplemental file, Table 1                 |
| Results of individual studies | 20 | For all outcomes considered (benefits or harms), present, for each study: (a) simple summary data for each intervention group (b) effect estimates and confidence intervals, ideally with a forest plot. | Figure 1, tables 1-4                       |
| Synthesis of results          | 21 | Present results of each meta-analysis done, including confidence intervals and measures of consistency.                                                                                                  | Figure 1, tables 1-4                       |
| Risk of bias across studies   | 22 | Present results of any assessment of risk of bias across studies (see Item 15).                                                                                                                          | In each section under results (11-14)      |
| Additional analysis           | 23 | Give results of additional analyses, if done (e.g., sensitivity or subgroup analyses, meta-regression [see Item 16]).                                                                                    | Tables 1-4                                 |

## DISCUSSION

For Peer Review Only

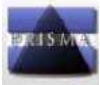

# PRISMA 2009 Checklist

1  
2  
3  
4  
5  
6  
7  
8  
9  
10  
11  
12  
13  
14  
15  
16  
17  
18  
19  
20  
21  
22  
23  
24  
25  
26  
27  
28  
29  
30  
31  
32  
33  
34  
35  
36  
37  
38  
39  
40  
41  
42  
43  
44  
45  
46  
47  
48  
49

|                     |    |                                                                                                                                                                                      |       |
|---------------------|----|--------------------------------------------------------------------------------------------------------------------------------------------------------------------------------------|-------|
| Summary of evidence | 24 | Summarize the main findings including the strength of evidence for each main outcome; consider their relevance to key groups (e.g., healthcare providers, users, and policy makers). | 14-16 |
| Limitations         | 25 | Discuss limitations at study and outcome level (e.g., risk of bias), and at review-level (e.g., incomplete retrieval of identified research, reporting bias).                        | 14-16 |
| Conclusions         | 26 | Provide a general interpretation of the results in the context of other evidence, and implications for future research.                                                              | 14-16 |
| <b>FUNDING</b>      |    |                                                                                                                                                                                      |       |
| Funding             | 27 | Describe sources of funding for the systematic review and other support (e.g., supply of data); role of funders for the systematic review.                                           | 2     |

From: Moher D, Liberati A, Tetzlaff J, Altman DG, The PRISMA Group (2009). Preferred Reporting Items for Systematic Reviews and Meta-Analyses: The PRISMA Statement. PLoS Med 6(6): e1000097. doi:10.1371/journal.pmed1000097

For more information, visit: [www.prisma-statement.org](http://www.prisma-statement.org).

Page 2 of 2
